1 **Alpha-synuclein fibrils induce autophagy in microglial cells as a consequence of**  
2 **lysosomal damage.**

3

4 Claudio Bussi<sup>1</sup>, Javier M. Peralta Ramos<sup>1</sup>, Daniela S. Arroyo<sup>1</sup>, Jose I. Gallea<sup>2</sup>, Paolo  
5 Ronchi<sup>3</sup>, Androniki Kolovou<sup>3</sup>, Ji M. Wang<sup>4</sup>, Oliver Florey<sup>5</sup>, Maria S. Celej<sup>2</sup>, Yannick  
6 Schwab<sup>3, 6</sup>, Nicholas T. Ktistakis<sup>5</sup>, Pablo Iribarren<sup>1\*</sup>.

7

8 <sup>1</sup>Center for Research in Clinical Biochemistry and Immunology (CIBICI-CONICET),  
9 Córdoba, Argentina, <sup>2</sup>Center for Research in Chemical Biology (CIQUIBIC-CONICET),  
10 Córdoba, Argentina, <sup>3</sup>EMBL, Electron Microscopy Core Facility, Heidelberg, Germany,  
11 <sup>4</sup>Laboratory of Molecular Immunoregulation, Cancer and Inflammation Program, Center for  
12 Cancer Research, National Cancer Institute at Frederick, Frederick, MD, USA, <sup>5</sup>Babraham  
13 Institute, Signalling Programme, Cambridge, UK, <sup>6</sup>EMBL, Cell Biology and Biophysics Unit,  
14 Heidelberg, Germany.

15 \*corresponding author

16 Corresponding author information: Dr. Pablo Iribarren, Ph.D., CIBICI-CONICET,  
17 Departamento de Bioquímica Clínica, Facultad de Ciencias Químicas, Universidad  
18 Nacional de Córdoba. Haya de la Torre y Medina Allende, Ciudad Universitaria. Córdoba  
19 X5000HUA. Argentina.

20 Tel: 54 351 4334164 extension 3133. FAX: 54 351 4333048.

21 Email: piribarr@fcq.unc.edu.ar

22

23 **Acknowledgements.** This work was supported in part by FONCyT, CONICET and  
24 SECyT-UNC, Argentina. Its contents are solely the responsibility of the authors and do not  
25 necessarily represent the official views of CONICET. C.B. thanks to EMBO, EMBL,  
26 Boehringer Ingelheim Fonds, IUBMB Wood-Whelan Fellowship and to The Company of  
27 Biologists Travelling Fellowships for supporting short-research stays abroad.

28

29

30

31

32 **ABSTRACT**

33 Autophagy is a constitutive lysosomal catabolic pathway that degrades damaged  
34 organelles and protein aggregates. In Parkinson's disease, the synaptic protein alpha-  
35 synuclein (AS) accumulates in neuronal cell bodies and axons. Recent studies indicate  
36 that aggregation-prone proteins can spread to other brain cells - such as glia - contributing  
37 to progressive deterioration.

38 Although autophagic dysfunction and protein aggregation have been linked to several  
39 neurodegenerative disorders, exact mechanisms are not clear and most work was done in  
40 neurons and not on microglial cells.

41 Here we report that AS fibrils but not monomers induce lysosomal damage and autophagy  
42 in microglial cells and we extensively characterized the dynamics of this response by both  
43 live-cell imaging and correlative light-electron microscopy (CLEM). In addition, we found  
44 that autophagy inhibition in these cells impairs mitochondrial quality and leads to microglial  
45 cell death. We propose that AS accumulation in lysosomes leads to lysosomal damage,  
46 which in turn activates canonical autophagy as a rescue mechanism.

47 Our results provide novel findings about the interaction between AS and the autophagy  
48 pathway in microglial cells, which may be important for targeting protein misfolding-  
49 associated neurodegenerative diseases.

50 **KEYWORDS:** alpha-synuclein/autophagy/microglia/lysosomes/cell death

51

52

53

54

55

## 56 INTRODUCTION

57 Neurodegenerative diseases are characterised by common cellular and molecular  
58 mechanisms including protein aggregation and inclusion body formation that result in  
59 toxicity and neuronal cell death [42] .

60 Autophagy dysfunction in the central nervous system (CNS) has been shown to induce  
61 neurodegeneration even in the absence of any disease-associated mutant proteins. Mice  
62 deficient for *Atg5* (autophagy-related 5) develop progressive deficits in motor function that  
63 are accompanied by the accumulation of cytoplasmic inclusion bodies in neurons [26]. On  
64 the other hand, mice lacking *Atg7* specifically in the CNS showed behavioural defects, a  
65 reduction in coordinated movement and massive neuronal loss in the cerebral and  
66 cerebellar cortices [33].

67 Although latest developments reveal a crucial role for the autophagy pathway in  
68 neurodegenerative diseases [23], the precise mechanisms underlying these processes are  
69 poorly understood. Furthermore, most of the existing literature related to autophagy in the  
70 CNS focuses on neurons and the effects of the autophagy pathway and its modulation on  
71 microglial cells remain poorly understood. Microglia are resident macrophage cells in the  
72 CNS and have multiple functions, such as phagocytosis, production of growth factors and  
73 cytokines, and antigen presentation. The major function of microglia is to maintain  
74 homeostasis and normal function of the CNS, both during development and in response to  
75 CNS injury [56].

76 Canonical autophagy starts with the assembly of a pre-initiation complex consisting of  
77 ULK1, FIP200, and ATG13, which in turn leads to activation of the VPS34/Beclin-1 PI3K  
78 complex and then formation and extension of a double-membraned autophagosome  
79 around cellular contents by the lipidation of the autophagic protein light chain 3 (LC3),  
80 through the action of two ubiquitin-like conjugation systems. ULK1 is subject to regulatory

81 phosphorylation by mTOR and AMPK, and this provides a means for the control of  
82 autophagy in response to nutrient status [36].

83 Lipidated LC3 was once thought to unambiguously distinguish autophagosomes from  
84 other cellular membranes. However, these past recent years, a non-canonical autophagy  
85 mechanism was reported in the literature depending on direct LC3 association with single  
86 limiting-membrane vacuoles and able to deliver the luminal content towards lysosomal  
87 degradation [45]. This unconventional pathway is known as LC3-associated phagocytosis  
88 (LAP) and it is involved in the maturation of single-membrane phagosomes and  
89 subsequent killing of ingested pathogens by phagocytes. LAP is initiated following  
90 recognition of pathogens by pattern recognition receptors and leads to the recruitment of  
91 LC3 into the phagosomal membrane [46].

92 Parkinson's disease (PD) is a late-onset neurodegenerative disorder caused by  
93 degeneration of dopaminergic neurons in the substantia nigra. This pathology is  
94 characterized by the presence of intracellular inclusions named Lewy bodies, which  
95 contain the proteins AS and ubiquitin. AS is a presynaptic neuronal protein that is linked  
96 genetically and neuropathologically to PD. AS may contribute to PD pathogenesis by  
97 distinct mechanisms, but novel evidences suggest that its aberrant fibril conformations are  
98 the toxic species that mediate disruption of cellular homeostasis and neuronal death,  
99 through effects on various intracellular targets, including synaptic function [55].

100 Furthermore, secreted AS may exert deleterious effects on neighbouring neuronal and  
101 glial cells, including seeding of aggregation, thus contributing to disease propagation.

102 Recent research suggests a complex role for microglia not only in PD but in other  
103 disorders involving AS aggregation, such as multiple system atrophy [58]. In addition, the  
104 novel concepts of AS being released in exosomes and uptaken by neighbouring cells, and  
105 their importance in disease progression, positions microglia as the main cell that can  
106 efficiently clear and handle AS [11, 41].

107 The pathogenic role of autophagy in PD was demonstrated by the finding that AS is  
108 degraded by macroautophagy and chaperone-mediated autophagy [64]. Emerging  
109 evidence has suggested that aberrant autophagy is one of the underlying mechanisms for  
110 hereditary forms of PD [31] and most of these studies showed that these genetic defects  
111 lead to autophagy impairment [52]. In addition, it has been shown that in degenerating  
112 neurons in PD brains, there is a breakdown of lysosomal membranes and mislocalization  
113 of lysosomal receptors and autophagy components [3, 29]. On the other hand, recent  
114 reports indicate that AS induce mitochondrial and lysosomal dysfunction and alters  
115 vesicular trafficking in PD, which may lead to AS accumulation [15, 48]. In this scenario the  
116 autophagy pathway plays a pivotal role as the main mechanism responsible for abnormal  
117 protein and organelle degradation [53].

118 Although significant progress has been done in unravelling the role and regulation of the  
119 autophagy machinery, its dysfunction in pathology as well as its dynamic changes in the  
120 disease progression remains largely unclear [42]. Further characterization of autophagy  
121 dynamics not only in neuronal but also in glial cells in combination with analysis of the  
122 ultrastructural details of the many novel organelles and mechanisms involved in specific  
123 subtypes of autophagy, for example, by discriminating autophagosomes from LAP, i.e.  
124 double- from single-limiting membrane of LC3-positive vesicles, may contribute for the  
125 development of novel therapeutic strategies in PD and other neurodegenerative disorders.  
126 In this report we investigated for the first time the effect of monomeric and fibrillar AS on  
127 the autophagy activity of microglial cells by live-cell imaging and EM techniques. We found  
128 that only fibrillar AS induces autophagy in microglial cells. Furthermore, we extensively  
129 characterized the dynamics of this response and we observed that activation of the  
130 autophagy pathway is concomitant to lysosomal damage. In addition, we analysed by  
131 high-precision and live CLEM experiments the ultrastructural morphology of the  
132 autophagic vesicles formed in AS stimulated cells. Moreover, we observed that autophagy

133 inhibition led to mitochondrial quality impairment and microglial cell death after AS  
134 stimulation.

135

## 136 **MATERIALS AND METHODS**

### 137 **Reagents**

138 Dulbecco's Modified Eagle Medium (DMEM), Opti-MEM, fetal bovine serum (FBS),  
139 penicillin, glutamine, G418, streptomycin, Silencer select FIP200 siRNA (4390771),  
140 Silencer select negative control 1 (4390843), Lipofectamine RNAiMAX (13778100) and  
141 LysoTracker Blue (L7525) were obtained from Thermo Fischer Scientific (Grand Island,  
142 NY, USA). Antibodies used for western blotting were rabbit polyclonal anti-LC3 (Sigma,  
143 L7543) and mouse monoclonal anti  $\beta$ -actin (Cell Signaling, 8H10D10). Antibodies used for  
144 immunofluorescence were rabbit monoclonal anti-LC3 A/B (Cell Signaling, D3U4C), rat  
145 monoclonal anti LAMP-1 (Biolegend, 121601), mouse monoclonal anti-Galectin-3  
146 (Biolegend, 125401), rabbit polyclonal anti-GALNS (GeneTex, 110237). PP242 (13643)  
147 and BafA1 (11038) were purchased from Cayman (Ann Arbor, MI, USA). Spautin-1  
148 (SML0440) was purchased from Sigma. MitoSpy™ Green FM and MitoSpy™ Orange  
149 CMTMRos were obtained from Biolegend (San Diego, CA, USA). Magic Red™ Cathepsin-  
150 B Kit was purchased from Bio-Rad (Hercules, CA, USA). FITC Annexin V Apoptosis  
151 Detection Kit was purchased from Becton Dickinson (San Jose, CA, USA).

152

### 153 **Cell culture and transfections**

154 The murine microglial cell line BV2 was a kind gift from Dr. Dennis J. Selkoe (Harvard  
155 Medical School, Center for Neurological Diseases, Brigham and Women's Hospital,  
156 Boston, MA, USA). The cells were grown in DMEM supplemented with 10% heat-  
157 inactivated FCS, 2mM glutamine and 100 ug/ml streptomycin and maintained at 37°C and  
158 5% CO<sub>2</sub>.

159 For stable GFP-LC3 expression, BV-2 cells were transduced with pBabe-GFP-LC3  
160 retrovirus generated as previously described [22]. Cells were selected with 10 $\mu$ g/ml  
161 blasticidin for 4 days. BV2 stably transfected with ATG13 were cultured in media identical  
162 in composition to wild-type media, except for the addition of 400  $\mu$ g/ml G418. BV2 cells  
163 were transfected with X-tremeGENE™ HP DNA Transfection Reagent (Roche,  
164 06366236001) following manufacturer's indications. CFP-LC3 plasmid was a kind gift from  
165 Dr. Tamotsu Yoshimori. Silencer Select FIP200 (Thermo Fischer, 4390771) and negative  
166 control siRNAs (Thermo Fischer, 4390843) solutions were prepared according to the  
167 manufacturer's instructions and experiments were performed 48h after transfection.  
168 Lipofectamine RNAiMAX (Thermo Fischer, 13778100) was used as transfection reagent.  
169

#### 170 **Isolation of primary microglial cells from adult mice**

171 After perfusion with PBS, brains from 6- to 8-wk-old mice C57BL/6J, (15 mice/group) were  
172 collected in DMEM, dispersed with scissors, resuspended in PBS containing 0.3%  
173 collagenase D (Roche, Indianapolis, IN, USA) and 10 mM HEPES buffer (Invitrogen,  
174 Carlsbad, CA, USA), and incubated 30 min at 37°C. Brain homogenates were then filtered  
175 in 70- $\mu$ m-pore cell strainers (Becton Dickinson), centrifuged (7 min, 1500 rpm), washed,  
176 and resuspended in 70% isotonic Percoll (GE Healthcare, Fairfield, CT, USA). Cell  
177 suspension (3.5 ml) was transferred to 15-ml polypropylene conical tubes with 5 ml of 25%  
178 isotonic Percoll, which were sequentially layered on top with 3 ml of PBS. After  
179 centrifugation (30 min, 800 g, 4°C), the 70%:25% Percoll interphase layers were collected,  
180 and the cells were washed. Finally, the adherent cells, which contained 90% of CD11b+  
181 cells, were cultured in DMEM supplemented with 10% heat-inactivated FCS, 2 mM  
182 glutamine, 100 U/ml penicillin, 100  $\mu$ g/ml streptomycin, 100  $\mu$ g/ml sodium pyruvate, and 10  
183 mM HEPES buffer (Invitrogen). Microglial cells were washed with PBS and resuspended in  
184 medium containing 10% heat-inactivated FCS, alpha-synuclein, or other stimuli and then

185 cultured for the indicated times at 37°C. Morphological changes were observed in a  
186 contrast phase microscope. Animal care was provided in accordance with the procedures  
187 outlined in the U.S. National Institutes of Health (NIH) Guide for the Care and Use of  
188 Laboratory Animals (Publication 86-23, 1985). The experimental protocols were approved  
189 by the Institutional Animal Care and Use Committee of Centro de Investigaciones en  
190 Bioquímica Clínica e Inmunología (CIBICI), Consejo Nacional de Investigaciones  
191 Científicas y Técnicas (CONICET). Our animal facility obtained NIH animal welfare  
192 assurance (assurance no. A5802-01, Office of Laboratory Animal Welfare, NIH, Bethesda,  
193 MD, USA).

194

#### 195 **Cell culture treatments**

196 BV2 cells were grown in six well plates to 65 to 70% confluence (for immunofluorescence)  
197 or 70 to 80% confluence (for western blotting) before treatments. Primary microglial cells  
198 were grown in chamber slides or 48 well plates to 65 to 70% confluence before treatments.  
199 AS fibrils and monomers were used at 5 $\mu$ M at indicated time points. PP242 was used at  
200 1 $\mu$ M for 3h. Mammalian PI3KC3 was blocked by the addition of spautin-1 (10  $\mu$ M) for 24h  
201 before stimulation. Autophagosome maturation was blocked using BAF, at final  
202 concentration of 200 nM, in normal growth medium for 1 h, unless otherwise stated.

203

#### 204 **Preparation of monomeric and aggregated AS**

205 Monomeric AS stock solutions were prepared in PBS buffer and 0.02% sodium azide and  
206 centrifuged (14100 g, 30 min) before use in order to remove possible aggregates. After  
207 that, solutions were sterilized by filtration (22  $\mu$ m pore size). Protein concentration was  
208 determined by absorbance using an  $\epsilon_{275}$  of 5600 M<sup>-1</sup> · cm<sup>-1</sup>. Fibrillation was achieved  
209 by incubating 400  $\mu$ M monomeric AS stock solutions at 70°C and 800 rpm in a  
210 Thermomixer5436 (Eppendorf), conditions that lead to faster aggregation kinetics [10]



211 Fibril formation was monitored using the ThioT (thioflavin T) fluorescence assay. Fibrils  
212 were isolated by three consecutive cycles of centrifugation (14000 g, 30 min) and  
213 resuspended in PBS buffer. Protein concentrations in monomeric units were determined  
214 by the absorbance of aliquots incubated in 6 M guanidinium chloride at 25°C for 24 h.  
215 Endotoxin levels were evaluated by Limulus Amebocyte Lysate (LAL) assay. Endotoxin  
216 content was lower than detection limit (<0,24 EU/mL). AS protein labelling: AS fibrils were  
217 conjugated by using Alexa Fluor 647 (Molecular probes, A2006) or Alexa Fluor 546  
218 (Molecular Probes, A2004) NHS Ester dye according to manufacturer´s instructions.

219

#### 220 **Western immunoblotting:**

221 After treatment with AS fibrils or monomers, 2x10<sup>6</sup> BV2 microglial cells were harvested by  
222 centrifugation at indicated time points. After washing with PBS, cells were lysed using  
223 sample buffer. Subsequently, cells lysates were sonicated and boiled. Proteins were  
224 electrophoresed on 12% SDS-PAGE gel under reducing conditions and transferred on to  
225 Immun-Blot PVDF Membrane (Bio-Rad, Hercules, CA, USA). The membranes were  
226 blocked with 5% nonfat milk and 0.1% Tween-20 in TBS for 2h at room temperature and  
227 then were incubated with primary antibodies overnight at 4°C. Then, membranes were  
228 incubated with secondary antibodies (IRDye, LI-COR Biosciences, Lincoln, Nebraska,  
229 USA) for 1h and 30 min at RT and protein bands were detected with an Odyssey Infrared  
230 Imaging System (LI-COR Biosciences).

231

#### 232 **Immunofluorescence assays**

233 Following the appropriated treatments BV2 cells grown on glass coverslips in 6-well plates,  
234 or primary microglial cells grown on Lab-Tek chamber slides (Thermo Fischer), were fixed  
235 with 100% ice-cold metanol for 10 min on ice. The cells were then blocked for a minimum  
236 of 1 h in 5% (w/v) BSA/PBS before staining with the appropriate primary antibodies. After

237 3 rinses with PBS, samples were incubated with Alexa Fluor 488 or Alexa Fluor 546  
238 secondary antibodies (Invitrogen) for 60 min. The slides were analyzed under a laser  
239 scanning confocal fluorescence microscope (Olympus FV1000; Olympus, Tokyo, Japan)  
240 or under a wide-field fluorescence microscope (Leica DMI8, Leica, Weitzlar, Germany).  
241 Galectin puncta assay: Staining for immunofluorescence and image analysis were done  
242 following a previously characterized protocol (Aits et al., 2015). Briefly BV2 or primary  
243 microglial cells were incubated in the presence or the absence of fibrillar AS and  
244 immunolabeled with a monoclonal rat anti-mouse galectin 3 antibody (Biolegend, 125402).  
245 Alternatively, immunostaining with a monoclonal rat anti-mouse galectin-3 Alexa Fluor 488  
246 conjugated antibody (Biolegend, 125410) was also performed. After that, fluorescence  
247 images were acquired under a wide-field or laser scanning confocal fluorescence  
248 microscope and galectin-3 puncta formation was followed over time. Incubation for 2h at  
249 37°C with a 500  $\mu$ M solution of LLOME crystals was used as positive control of lysosomal  
250 damage. Spatial deconvolution, 3D surface-rendered images and 3D surface-rendered  
251 movies were carried out with SVI Huygens Software. Image processing and analysis were  
252 performed using FIJI software (NIH) (Schindelin, Arganda-Carreras et al., 2012).

253

#### 254 **Live-cell imaging:**

255 Live-cell imaging was performed in cells that had been plated on to 22-mm diameter  
256 coverslips (BDH) and transiently transfected with the relevant constructs. Individual  
257 coverslips were placed in an imaging chamber with 2 ml of medium and the appropriate  
258 treatment. LysoTracker Blue (1:10000; Thermo Fischer, L7525), where stated, was added  
259 to samples 30 min before imaging began. Samples were then placed in a Solent  
260 environment chamber (Solent Scientific, custom made) before mounting on the  
261 microscope, all at 37°C. Widefield imaging experiments were performed on a Nikon Ti-E-  
262 based system. The Nikon Ti-E-based system comprised a Nikon Ti-E microscope, 100x

263 1.4 N.A. objective (Nikon), SpecraX LED illuminator (Lumencor), 410/504/582/669-Di01  
264 and Di01-R442/514/561 dichroic mirrors (Semrock), Hamamatsu Flash 4.0 sCMOS  
265 camera, emission filter wheel (Sutter Instruments) and was controlled using Nikon  
266 Elements software. Excitation and emission filters (all from Semrock) were as follows: CFP  
267 434/17 (ex) 480/17 (em), GFP 480/10 (ex) 525/30 (em), mRFP 560/25 (ex) 607/36 (em).

268

### 269 **Correlative Light-Electron Microscopy (CLEM) experiments:**

270 Widefield-electron microscopy correlation assays: BV2 GFP-LC3 cells were cultured on 3-  
271 mm carbon-coated sapphire discs and stimulated with labelled AS (3uM) for 12h. High  
272 pressure freezing, ultrathin sectioning for electron microscopy, image acquisition and  
273 correlation analysis were done as described previously [37]. Briefly, after cellular  
274 stimulation, microglial cells were high pressure frozen using an Abra Fluid HPM-010 (Abra  
275 Fluid, Switzerland) and transferred to the automated freeze substitution apparatus (Leica  
276 EM AFS2) under liquid nitrogen. Semithick 300-nm sections were prepared using a Leica  
277 UC6/UF6 ultramicrotome and picked up on finder 200 mesh copper grids coated with  
278 carbon. After that, immunofluorescence images were acquired using an Olympus Scan<sup>AR</sup>  
279 microscope. Previous to the EM acquisition, colloidal gold particles, 10 nm in diameter,  
280 were placed on top of the sections to serve as fiducial markers for alignment of the  
281 tomograms. Tilt series were acquired on a Tecnai F30 microscope (FEI, Netherlands)  
282 operating at 300 kV with a OneView camera (Gatan Inc., USA) at a binned (2) pixel size of  
283 1.25 nm using SerialEM [47]. Images were recorded at 1 degree intervals over a tilt range  
284 of +60 to -60 degrees. Electron and fluorescent images overlay were obtained by using ec-  
285 CLEM plugin [54] from ICY software [13] IMOD software package [34] was used to create  
286 3D reconstructions from the tilt series and to create 3D models of the autophagosomes  
287 and membranes. LIVE-CLEM assays: BV2 GFP-LC3 cells were grown on a gridded  
288 MatTek (Ashland, MA, USA) and live-imaged by widefield microscopy using a Zeiss

289 Celldiscoverer7 microscope, (Zeiss, Germany) after 12h of AS stimulation. A bright field  
290 image of the area containing the cell of interest was acquired at low magnification to  
291 visualize the grid and therefore precisely localize the position of the cell. Cells were fixed in  
292 2.5% glutaraldehyde (GA, Electron Microscopy Sciences) in 0.1M cacodylate buffer  
293 immediately after detecting the event of interest. The subsequent EM processing steps  
294 (OSO<sub>4</sub>, UA, dehydration) were performed using a PELCO Biowave Pro microwave  
295 processor (Ted Pella, Inc.). After dehydration the coverslip was detached from the MatTek  
296 dish and put on an Epon-filled capsule. After polymerization, the area containing the cell of  
297 interest was retrieved by means of the grid coordinate system that remained impressed on  
298 the block surface. The blocks were then sectioned with a Leica UC7 ultramicrotome and  
299 300nm sections were collected on formvar coated slot grids. Tilt series of the cell of  
300 interest were acquired with a FEI Tecnai F30 electron microscope. Tomogram  
301 reconstruction, segmentation and 3D rendering was carried out with the IMOD software  
302 package [34].

303

#### 304 **Evaluation of mitochondrial quality and Cathepsin-B activity**

305 BV2 microglial cells were left untreated or stimulated with fibrillar AS from 8 to 48h. After  
306 that, the cells were harvested, washed twice with fresh medium and incubated for 30min at  
307 37°C in DMEM supplemented with 10% heat-inactivated FCS containing the following  
308 dyes: 100 nM MitoSpy Green FM (Biolegend, 424805) to measure mitochondrial mass,  
309 100 nM MitoSpy Orange CMTMRos (Biolegend, 424803) to measure mitochondrial  
310 membrane potential and 26X Magic Red Cathepsin-B substrate (BioRad, ICT937) to  
311 measure Cathepsin-B activity. Cells were then washed and resuspended in 300uL of  
312 FACS buffer. Flow cytometric analysis were performed on a FACSCanto II cytometer  
313 (Becton Dickinson) using FCS De Novo Software.

314

### 315 **Evaluation of cell death by flow cytometry**

316 BV2 microglial cells and primary microglial cells were washed twice with PBS and  
317 incubated with propidium iodide (PI) for 2 minutes in 300uL of FACS buffer. For annexin V  
318 (AnV) and PI dual staining, the cells were harvested, washed twice with binding buffer, and  
319 incubated with FITC-conjugated AnV and PI following manufacturer instructions (FITC  
320 Annexin V Apoptosis Detection Kit, Becton Dickinson). For Bcl-2, Bcl-xL and cleaved  
321 caspase-3 staining, BV2 cells were fixed and permeabilized by using Cytofix/Cytoperm kit  
322 (Becton Dickinson) and incubated with the monoclonal primary antibodies (Cell Signaling).  
323 After 1h, cells were washed and incubated for 30 min with an anti-rabbit Alexa Fluor 488  
324 antibody. After that cells were washed with PBS and resuspended in 300uL of FACS  
325 buffer. Microglial cells were then analyzed by flow cytometry on a FACSCanto II cytometer  
326 (Becton Dickinson) using FCS De Novo Software.

327

### 328 **Statistical analyses**

329 The results were analysed using one-way analysis of variance (ANOVA) model, as  
330 indicated for every experiment. GraphPad Prism 6.0 was used to carry out the  
331 computations for all analyses. Results represent mean $\pm$ SEM of at least three experiments.  
332 Statistical significance was defined as  $p \leq 0.05$ .

333

334

335

336

337

338

339

340

## 341 **RESULTS**

342

### 343 **Fibrillar but not monomeric AS induces autophagy in microglial cells**

344 We first analysed the effect of different AS aggregation states on autophagy induction in  
345 microglial cells. We stimulated BV2 and primary microglial cells with both exogenous  
346 fibrillar and monomeric AS at different time points. Based on a recent report from our  
347 group, we selected 5  $\mu$ M as protein concentration since no significant toxicity is observed  
348 either in BV2 or primary microglial cells after long-term cell culture [9]. Interestingly, we  
349 observed by immunofluorescence visualization (Fig. 1A) that only fibrillar, but not  
350 monomeric AS, increased the punctate localization of LC3. In addition, this response  
351 increased substantially after 12h of stimulation (Fig.1A). We did not find changes in the  
352 autophagic response after monomeric stimulation at all time-points studied.

353 We next aimed to determine the subcellular localization of fibrillar AS after cellular  
354 internalization and its distribution in comparison to the autophagy marker LC3. We  
355 stimulated BV2 cells stably expressing GFP-LC3 (BV2 GFP-LC3) with Alexa Fluor 594 AS  
356 fibrils for 12h, then, BV2 cells were stained for lysosomal-associated membrane protein 1  
357 (LAMP-1). We found, by confocal microscopy and enhanced visualization by using 3D cell  
358 surface rendering approaches, that AS fibrils were confined to lysosomes and LC3  
359 vesicles were distributed around them (FIG. 1D, F and G). In addition, we obtained similar  
360 results by using primary microglial cells (FIG. 1E, H and I). In order to confirm lysosomal  
361 localization for AS fibrils, we analysed the colocalization between the lysosomal specific  
362 enzyme N-acetylgalactosamine-6-sulfatase (GALNS) and fibrillar AS in primary microglial  
363 cells. Accordingly, these results showed high degree of colocalization between both labels  
364 (Fig. S2A).

365 In parallel experiments we studied the autophagic response by immunoblotting. Initiation of  
366 autophagy causes the conversion of LC3-I to LC3-II via the addition of a

367 phosphatidylethanolamine (PE) group to the C terminus. We evaluated the conversion of  
368 LC3-I (non lipidated form with lower electrophoretic mobility) to LC3B-II (LC3 form C-  
369 terminally lipidated by PE, displaying higher electrophoretic mobility). In agreement with  
370 our previous results, we found an increase in the intensity of the LC3B-II band relative to  
371 the intensity of  $\beta$ -actin band after fibrillar but not monomeric AS stimulation (Fig. 1B and C).  
372 When Bafilomycin A1 (BAF) was added to fibrillar AS (hereafter fAS) stimulated cells, we  
373 observed an increase in the relative levels of LC3B-II in comparison with AS stimulation  
374 alone, indicating that fAS induces autophagy in microglial cells and it does not simply block  
375 autophagosome degradation (Fig. 1B and C). Overall, these results show that fAS has  
376 predominantly lysosomal localization after cellular internalization and it induces autophagy  
377 in microglial cells. The monomeric conformation was not able to activate the autophagy  
378 pathway at the time and dose studied.

379

### 380 **Autophagy dynamics of AS-stimulated microglial cells**

381 To further study the autophagic response triggered by fAS in microglial cells, we  
382 conducted live-imaging experiments at different time points after fAS stimulation. We used  
383 BV2 GFP-LC3 microglial cells and LysoTracker Blue for lysosomal staining. We did not  
384 observe a significant increase in LC3 puncta during the first 8h after fAS stimulation (Fig.  
385 S1, SV6-9). Of note, fAS was quickly internalized during the first 20 min by microglial cells  
386 and it showed lysosomal localization since the earliest time points (Fig. S1C, SV5).  
387 Interestingly, after 12h of stimulation we detected a substantial increase in the autophagy  
388 response. LC3 vesicles increased over time and were predominantly associated with  
389 LysoTracker +/ fAS + vesicles forming a ring-like structure around them, as observed  
390 previously by confocal analysis (Fig. 2A and B, SV1 and SV2). In additional experiments,  
391 BV2 cells stably expressing GFP-ATG13 were co-transfected with CFP-LC3 plasmid.  
392 ATG13 integrates the autophagy initiation complex ULK1, the most upstream complex of

393 the autophagy pathway and it is essential for autophagosome formation [5, 32]. In  
394 agreement with previous reports and autophagy dynamic studies, we observed positive  
395 ATG13 signal as an early event during autophagosome formation and its lifetime was  
396 shorter than the same structures containing LC3 (Fig. 2C and D, SV3 and SV4). As seen  
397 before, the LC3 signal associated with ATG13 progressed into characteristic rounded  
398 structures around synuclein fibrils.

399 Taken together these results indicate that the autophagic response to fAS follows a  
400 canonical route (utilising ATG13-positive structures that mature into LC3-positive  
401 structures), but it is not an immediate event after synuclein treatment. The facts that  
402 lysosomes containing fAS are surrounded by LC3 vesicles suggests the possibility that the  
403 autophagic machinery may respond to lysosomal damage caused by the fibrils, and this is  
404 a question we will address later.

405

#### 406 **CLEM study of fAS-stimulated microglial cells evidences canonical autophagy**

407 There are increasing reports showing the involvement of the non-canonical autophagy  
408 pathway in diverse pathological conditions since it was described for the first time.

409 Although important advances have been made in the molecular characterization and  
410 differentiation between these alternative routes, we are still far from precisely  
411 understanding the mechanistic details and limits of both pathways [19, 46]. The principal  
412 difference between autophagosomes and non-canonical vacuoles is that the former have  
413 two limiting membranes positive for LC3 whereas the latter have one. In order to  
414 discriminate these different processes, we conducted CLEM experiments and analysed  
415 the presence of single or double membrane LC3-positive vesicles after fAS stimulation of  
416 BV2 GFP-LC3 microglial cells.

417 We clearly detected double membrane autophagic vesicles (AV) mainly correlating with  
418 LC3-GFP signal and closely associated with fAS+ structures (Fig. 3A-F, SV10, SV11 and



419 SV12). Furthermore, we also observed double membrane vesicles and multi-membrane  
420 structures surrounded by a single-limiting membrane, probably as a result of fusion events  
421 between autophagosomes and lysosomes (Fig.3A-F, SV10, SV11 and SV12). These  
422 results are in agreement with a previous report describing similar AVs found on neocortical  
423 biopsies from AD human brain [51]. In agreement with Nixon et. al, the morphologies and  
424 composition of vesicles that accumulated after fAS treatment corresponded to those of the  
425 vesicular compartments of the autophagic pathway. Although we did not find enough  
426 evidence of quantitative ultrastructural analyses of glial organelles in the literature [7], most  
427 of the vesicles we observed in fAS-stimulated microglial cells correlated with standard  
428 morphometric criteria for the immature and mature autophagosomes as expected for  
429 neural cells [17, 18]. These criteria include a size >0.5  $\mu\text{m}$  in diameter, a double-limiting  
430 membrane (immature), and the presence within a single vesicle of multiple membranous  
431 domains from organelle sources such as, Golgi, mitochondria or endoplasmic reticulum  
432 (Fig. 3C, D and E, SV10, SV11 and SV12). We also observed similar AV morphology in  
433 non-treated microglial cells although single-membrane vesicles presented a smaller size in  
434 comparison to stimulated cells (Fig. S3). Moreover, in order to improve the detection of  
435 autophagosomes around fAS+ vesicles, we carried out additional CLEM experiments with  
436 fAS-stimulated microglial cells previously treated with BAF. Similar to our previous results,  
437 we found examples where an autophagosome was in close proximity to a larger AV (Fig.  
438 3I and J) and as expected, we also detected areas where double-membrane  
439 autophagosomes accumulated around other AVs (Fig. 3 G and H, SV13).

440 To more precisely examine the ultrastructural nature of the AV formed after AS stimulation  
441 in microglial cells, we conducted live-CLEM assays. We stimulated BV2 GFP-LC3 cells  
442 with fAS for 12h and we followed the autophagy response by time-lapse widefield imaging  
443 and subsequent EM analysis (Fig. 4A and B). As we observed previously, an LC3 ring-like  
444 structure was formed around fAS (Fig. 4A). Interestingly, we found that the LC3-positive

445 area predominantly correlated with a central double membrane autophagosome closely  
446 located to other single and double-membrane vesicles that were also positive for fAS  
447 signal (Fig. 4D and E, SV14 and SV15). In an additional live-CLEM experiment (Fig. 4C, G  
448 and H, SV16 and SV17) we observed that the region positive for LC3 signal correlated  
449 with concentric multi-membrane structures with a central double membrane vesicle  
450 exhibiting a dense core. Moreover, these structures were in close contiguity with ER  
451 membranes, suggesting that the ER could be a main membrane donor in this process.  
452 These observations are in concordance with a previous electron tomography study  
453 showing that the ER associates with early autophagic structures and acts as a membrane  
454 source for autophagosome formation [28].

455 Overall, these results provide evidence of canonical autophagy, instead of LAP, as the  
456 main effector pathway in microglial cells after fAS internalization.

457

#### 458 **Effects of fAS on lysosomal and mitochondrial quality of microglial cells.**

459 Galectin-3 (Gal-3) is a sugar binding protein which recognizes beta-galactoside normally  
460 only present on the exterior leaflet of the plasma membrane and the interior leaflet of  
461 intracellular vesicles [60]. Gal-3 relocalization has been utilized to identify ruptured  
462 vesicles when bacteria and viruses enter the cytoplasm during infection [43, 62]. Recent  
463 studies have also demonstrated that even in the absence of bacteria or viruses, some  
464 galectins can translocate to damaged lysosomes before their removal by the autophagic  
465 pathway [24]. Since one of the possible mechanisms inducing autophagy in our cells may  
466 be following lysosomal damage, we used a recently described protocol to assess  
467 lysosomal damage recognised by Gal-3 [2]. We stimulated BV2 and primary microglial  
468 cells with labelled fAS at different time points and we analysed by confocal microscopy  
469 whether Gal-3 translocated to damaged lysosomes (Fig. 5 and Fig. S2D). L-leucyl-L-  
470 leucine methyl ester (LLOMe), which induces lysosome-specific membrane damage [63],

471 was used as a positive control. In accordance with the autophagy dynamics previously  
472 described, we detected a significant change, from diffuse to punctate staining pattern, after  
473 12h of fAS treatment but not during earlier time points (Fig. 5 and Fig. S2C). In addition,  
474 we observed a high extent of colocalization of Gal-3 with both fAS and Lamp-1 (Fig. 5C  
475 and D).

476 We next evaluated if the LC3 positive vesicles formed after fAS stimulation colocalized  
477 with Gal-3 puncta and found a high degree of colocalization. This suggests that lysosomal  
478 damage acts as a positive signal for autophagy activation in fAS-stimulated microglial cells  
479 (Fig. 5E). These results are in agreement with the manuscript by Flavin et al. [21]  
480 describing that lysosomes ruptured by AS in SH-SY5Y neuronal cells are targeted for  
481 autophagic degradation. We also assessed if fAS could disturb lysosomal activity by using  
482 a Cathepsin-B fluorometric assay to monitor enzyme activity at different time points after  
483 microglial cell stimulation. We found a significant increase in Cathepsin-B activity after 8h  
484 of treatment which diminished to basal levels after 12h (Fig 6A), coincident with lysosomal  
485 impairment detection. These results indicate that lysosomes respond to the presence of  
486 fAS increasing Cathepsin-B activity which decreases with the progression of lysosomal  
487 damage.

488 In parallel experiments, we also evaluated mitochondrial status since mitochondrial  
489 dysfunction has been associated with several neurodegenerative diseases and AS was  
490 shown to alter mitochondrial activity [20]. However, we did not find changes either in  
491 mitochondrial mass nor mitochondrial cell membrane potential after fAS stimulation at the  
492 different time points studied (Fig. 6B). Overall these findings indicate that fAS induces  
493 lysosomal but not mitochondrial damage, with a similar kinetic as observed to autophagy  
494 activation, suggesting that this response is concomitant to lysosomal impairment.

495

496

## 497 **Autophagy prevents cell death in fAS-stimulated microglial cells**

498 Autophagy is intimately associated with eukaryotic cell death and apoptosis. However the  
499 molecular connections between autophagy and cell death are complex and, in different  
500 contexts, autophagy may promote or inhibit cell death [4, 14, 25]. We therefore evaluated  
501 the effects of autophagy inhibition on microglial cell survival. We inhibited autophagy by  
502 using spautin-1, which promotes the degradation of VPS34 PI3 kinase complexes by  
503 inhibiting two ubiquitin-specific peptidases, USP10 and USP13 that target the Beclin1  
504 subunit of VPS34 complexes [40]. In addition, we also used a siRNA targeting FIP200, a  
505 pivotal protein required for autophagy induction and autophagosome formation [27]. We  
506 evaluated the ability of spautin-1 and siRNA FIP200 to inhibit autophagy by confocal  
507 microscopy analysis of LC3 puncta formation after treating BV2 GFP-LC3 microglial cells  
508 with PP242, a specific mTORC1 inhibitor and autophagy inducer. We observed that both  
509 treatments significantly suppressed the autophagy response (Fig. S2B and C). Moreover,  
510 autophagy blockade by spautin-1 and siRNA FIP200 also decreased LC3 puncta formation  
511 in fAS-stimulated primary microglial cells (Fig. S2D).

512 We next investigated whether autophagy inhibition prior to fAS stimulation affects  
513 microglial cell viability. BV2 and primary microglial cells were cultured in the presence or  
514 the absence of spautin-1 or siRNA FIP200 and stimulated with fAS for 24h, then we  
515 evaluated microglial cell death by flow cytometry. We found an increase in the frequency  
516 of dead cells (AnV+/PI+) when autophagy was inhibited by these treatments in fAS-  
517 stimulated microglial cells. Similar results were obtained with both BV2 and primary  
518 microglial cells (Fig. 6C and D).

519 Mitochondrial outer membrane permeabilization (MOMP) is often required for activation of  
520 the caspase proteases that cause apoptotic cell death. As a consequence, mitochondrial  
521 outer membrane integrity is highly controlled, primarily through interactions between pro-  
522 and anti-apoptotic members of the B cell lymphoma 2 (BCL-2) protein family [61]. Bcl-2

523 and Bcl-xL anti-apoptotic proteins promote cell survival by preventing mitochondrial  
524 membrane permeabilization and subsequent content release which leads to caspase  
525 activation and ultimately, programmed cell death [59].  
526 On the other hand, lysosomal damage and resulting lysosomal membrane  
527 permeabilization have been shown to induce apoptosis through MOMP, which can be  
528 brought about by cathepsin-mediated activating cleavage of pro-apoptotic Bid or inhibiting  
529 cleavage of anti-apoptotic Bcl-2 and Bcl-xL proteins [1, 12, 16]. Here, we also evaluated by  
530 flow cytometry the expression levels of Bcl-2, Bcl-xL and cleaved caspase-3 in fAS-  
531 stimulated BV2 microglial cells in the presence or the absence of both autophagy  
532 inhibitors. We found a decreased in Bcl-2 and Bcl-xL protein levels with a concomitant  
533 increase in cleaved-caspase-3 expression when autophagy was impaired (Fig. 6E). In  
534 parallel experiments we analysed mitochondrial mass and membrane potential changes  
535 after autophagy inhibition in fAS-stimulated microglial cells. We detected an increase in  
536 mitochondrial mass and a decrease in the mitochondrial membrane potential after  
537 autophagy blockade (Fig. 6F), which evidences the autophagy requirement for  
538 mitochondrial homeostasis. Collectively, our results showed that AS induced lysosomal  
539 damage and autophagy activation and the inhibition of this degradative pathway led to  
540 mitochondrial quality impairment, which includes MOMP, and consequent microglial cell  
541 death.

542

## 543 **DISCUSSION**

544 Misfolding and intracellular aggregation of AS are thought to be crucial factors in the  
545 pathogenesis of Lewy body diseases (LBDs), such as PD. Recent studies suggest that  
546 small amounts of AS are released from neuronal cells by unconventional exocytosis, and  
547 that this extracellular AS contributes to the major pathological features of LBD, such as  
548 neurodegeneration, progressive spreading of AS pathology, and neuroinflammation [38].

549 In these neurodegenerative processes, the activation of microglia is a common  
550 pathological finding, which disturbs the homeostasis of the neuronal environment.  
551 Microglia's behaviour is therefore a determinant on the disease's progression.  
552 In our present study, we show by confocal microscopy and immunoblotting analysis that  
553 fAS but not its monomeric conformation induces autophagy in microglial cells. Our results  
554 are in accordance with previous observations showing that AS fibrils are more potent  
555 cellular activators than other aggregation states. In agreement with a recent article from  
556 our group, Hoffman et al. found that fAS increased the production and secretion of pro-  
557 inflammatory cytokines in microglial cells in a greater extent than oligomers or monomers  
558 [9, 30].  
559 Autophagy is a highly dynamic pathway and live-cell imaging has been extensively used to  
560 follow autophagy events in real-time [32]. Nonetheless, most of the studies monitoring the  
561 autophagic flux in glial cells were done by fluorescence microscopy of fixed cells and little  
562 is known about autophagy dynamics in microglial cells.  
563 Here, we extensively characterized the autophagy dynamics of microglial cells stimulated  
564 with fAS by live-cell imaging. We observed that although fAS is quickly internalized by  
565 microglial cells, autophagy induction was evident after 12h of stimulation. Interestingly, we  
566 observed that LC3 decorated lysosomes containing fAS forming a ring-like structure  
567 around them. In additional experiments with stably expressing ATG13 BV2 cells we  
568 detected ATG13-positive structures that progresses into LC3-positive vesicles, which  
569 coincides with previous autophagy dynamic reports [32, 35] and suggest that the  
570 autophagic response to fAS follows a canonical pathway.  
571 The kinetics of autophagy we observed contrasts with dynamics studies of LAP where  
572 phagosomes are rapidly decorated with LC3, usually within minutes [45]. Although we  
573 cannot rule out the involvement of the non-canonical pathway during this process, we  
574 could effectively correlate by high-precision and live-CLEM approaches, LC3-positive

575 structures with double-membrane bound AV formed after fAS stimulation, indicating a  
576 predominant role for the canonical autophagy pathway rather than its alternative route  
577 during this process.

578 Recent evidence indicates that AS could disturb neuronal metabolism, by inducing  
579 lysosomal and mitochondrial damage [8, 24, 65]. Nevertheless, the effects of AS on glial  
580 organelles is poorly understood. Here, we report that fAS is incorporated into lysosomes  
581 after cellular internalization and it induces lysosomal damage in microglial cells at the  
582 same time point as when the autophagy response is significantly activated. Moreover, we  
583 showed a high degree of co-localization between Gal-3 puncta and LC3, suggesting that  
584 lysosomal damage rather than fAS acts as an activator signal for autophagy induction. In  
585 agreement with our results, Flavin et al. [21] showed that AS induced lysosomal rupture in  
586 SH-SY5Y neuroblastoma cells and LC3 colocalized with Gal-3-positive damaged vesicles.  
587 Moreover, the authors observed by immunofluorescence microscopic analysis on sections  
588 from PD patients that LBs aggregates were surrounded by Gal-3. Collectively, considering  
589 these literature evidences and our data shown here, we propose that accumulation of  
590 pathological protein aggregates and the formation of inclusions such as LBs arise from the  
591 failure of cellular attempts to degrade ruptured vesicles (and their amyloid contents)  
592 through the autophagy-lysosome pathway. Furthermore, Freeman et al. [24] showed that  
593 AS induces lysosomal rupture and Cathepsin-B release in neuronal cells after endocytosis.  
594 In addition, cysteine cathepsins were shown to be pivotal for lysosomal degradation of AS  
595 fibrils [49]. Although we observed a sharp increase in Cathepsin-B levels 8h after fAS  
596 stimulation, it notably diminished 12h after treatment which could indicate an overwhelmed  
597 lysosomal ability to degrade AS aggregates, leading ultimately to lysosomal damage.

598 Although previous reports have indicated that AS induces mitochondrial damage in  
599 neurons [6, 44], we did not find significant changes either in mitochondrial mass or

600 membrane potential at the different time points studied, indicating that fAS does not alter  
601 mitochondrial quality during the first 48h of stimulation in microglial cells.

602 There are increasing research articles providing evidence about the pivotal role of  
603 autophagy during CNS homeostasis and disease progression. The generation and  
604 analysis of the first nervous system-specific conditional knockout for ATG7, an E1-like  
605 enzyme that is essential for autophagy, revealed that while the conditional knockouts were  
606 born viable and were indistinguishable from control littermates for the first days of their life,  
607 they developed growth retardation as early as P14 and demonstrated various motor and  
608 behavioural deficits [33, 50]. Mice deficient for Atg5 specifically in neural cells have also  
609 been developed and analysed. These conditional mutants developed progressive deficits  
610 in motor function that are accompanied by the accumulation of cytoplasmic inclusion  
611 bodies in neurons. In Atg5<sup>-/-</sup> cells, diffuse, abnormal intracellular proteins accumulate and  
612 then form aggregates and inclusions [26]. Taken together, these evidences suggest that  
613 the continuous clearance of diffuse cytosolic proteins through basal autophagy is important  
614 for preventing the accumulation of abnormal proteins, which can disrupt neural function  
615 and ultimately lead to neurodegeneration.

616 Nonetheless, in the models discussed above autophagy was impaired not only in neurons  
617 but also in glial cells, yet the role of autophagy in glia and the contribution of defective glial  
618 autophagy in neurodegeneration remain poorly characterized.

619 In this report, we analysed the effect of disrupting autophagy on microglial cell survival  
620 after fAS stimulation. We observed by both spautin-1 treatment and down-regulation of  
621 FIP200 by siRNA increased levels of cell death of fAS-stimulated microglial cells. Our  
622 findings agreed with a previous report indicating that neural-specific deletion of FIP200,  
623 involved in autophagosome biogenesis, caused axonal degeneration in cerebellar neurons  
624 eventually causing their death [39].



625 The mitochondria-mediated caspase activation pathway is a major apoptotic pathway  
626 characterized by MOMP and subsequent release of cytochrome c into the cytoplasm to  
627 activate caspases. MOMP is regulated by the Bcl-2 family of proteins which act as  
628 inducers or blockers of the process [66]. Of relevance to this work, it has been shown that  
629 lysosomal damage can induce MOMP-dependent cell death and lysosomal proteases  
630 released into the cytosol have been implicated in apoptotic cell death [57]. In the present  
631 study, we found that autophagy inhibition increased mitochondrial mass but impaired  
632 mitochondrial membrane potential, down-regulated Bcl-2 and Bcl-xL protein levels and  
633 increased cleaved caspase-3 protein expression in fAS-stimulated BV2 cells, which  
634 suggest activation of apoptosis. Although we cannot disregard additional upstream signals  
635 triggering MOMP, we consider it likely that lysosomal damage, together with the inability of  
636 the autophagic pathway to clear this organelle, leads to MOMP and ultimately to cell  
637 death. Collectively, our results suggest a protective role for the autophagy pathway in fAS-  
638 stimulated microglial cells.

639 Extracellular AS, has emerged as a crucial player in the pathogenesis of LBDs and,  
640 possibly, MSA. Recent studies have provided evidence that extracellular AS alone,  
641 particularly fibrils, can be responsible for all the major pathological changes in  
642 neurodegenerative diseases: aggregate deposition and spreading, neuroinflammation and  
643 neurodegeneration [55]. Several articles have indicated that extracellular AS activates  
644 microglial cells producing an increase in the release and production of pro-inflammatory  
645 mediators. However, this is to the best of our knowledge, the first study showing that fAS  
646 induces lysosomal damage and autophagy in microglial cells, describing the dynamics of  
647 this response and correlating light-microscopy imaging with the specific subcellular  
648 autophagic compartments participating during this process. In this manuscript we provide  
649 new insights into the effects of AS on microglial autophagy and cell survival and we  
650 propose that AS-induced lysosomal damage activates canonical autophagy as a rescue

651 mechanism. Future research evaluating the molecular mechanisms triggered by protein  
652 aggregates, such as AS, on glial cells would shed light on novel therapeutic targets for  
653 neurodegenerative disorders.

654

#### 655 **Author Contributions**

656 C.B. performed all experiments, designed the research study and wrote the manuscript.  
657 J.M.P.R. and D.S.A. collaborated in cell culture, westernblot, confocal microscopy and flow  
658 cytometry experiments. P.R and A.K collaborated in the design, acquisition and analysis of  
659 CLEM experiments, O.F. contributed with BV2 GFP-LC3 production and edited the  
660 manuscript, J.I.G. and M.S.C. contributed reagents/materials/analysis tools, Y.S.  
661 contributed with the design of CLEM experiments and edited the manuscript, N.T.K.  
662 contributed with reagents/materials/analysis tools, the design of the study and edited the  
663 manuscript, P.I. designed the research study and wrote the manuscript and is the  
664 corresponding author and holds all the responsibilities related to this manuscript.

665

666 **Conflict of interest:** The authors declare that they have no conflict of interest.

667

668

669

670

671

672

673

674

675

676 **REFERENCES**

- 677 1 Aits S, Jaattela M (2013) Lysosomal cell death at a glance. *J Cell Sci* 126: 1905-1912 Doi  
678 10.1242/jcs.091181
- 679 2 Aits S, Krickler J, Liu B, Ellegaard AM, Hamalisto S, Tvingsholm S, Corcelle-Termeau E, Hogh  
680 S, Farkas T, Holm Jonassen A et al (2015) Sensitive detection of lysosomal membrane  
681 permeabilization by lysosomal galectin puncta assay. *Autophagy* 11: 1408-1424 Doi  
682 10.1080/15548627.2015.1063871
- 683 3 Alvarez-Erviti L, Rodriguez-Oroz MC, Cooper JM, Caballero C, Ferrer I, Obeso JA, Schapira  
684 AH (2010) Chaperone-mediated autophagy markers in Parkinson disease brains. *Arch*  
685 *Neurol* 67: 1464-1472 Doi 10.1001/archneurol.2010.198
- 686 4 Arroyo DS, Soria JA, Gaviglio EA, Garcia-Keller C, Cancela LM, Rodriguez-Galan MC, Wang  
687 JM, Iribarren P (2013) Toll-like receptor 2 ligands promote microglial cell death by inducing  
688 autophagy. *FASEB J* 27: 299-312 Doi 10.1096/fj.12-214312
- 689 5 Axe EL, Walker SA, Manifava M, Chandra P, Roderick HL, Habermann A, Griffiths G,  
690 Ktistakis NT (2008) Autophagosome formation from membrane compartments enriched in  
691 phosphatidylinositol 3-phosphate and dynamically connected to the endoplasmic  
692 reticulum. *J Cell Biol* 182: 685-701 Doi 10.1083/jcb.200803137
- 693 6 Bir A, Sen O, Anand S, Khemka VK, Banerjee P, Cappai R, Sahoo A, Chakrabarti S (2014)  
694 alpha-Synuclein-induced mitochondrial dysfunction in isolated preparation and intact  
695 cells: implications in the pathogenesis of Parkinson's disease. *J Neurochem* 131: 868-877  
696 Doi 10.1111/jnc.12966
- 697 7 Bisht K, Sharma KP, Lecours C, Sanchez MG, El Hajj H, Milior G, Olmos-Alonso A, Gomez-  
698 Nicola D, Luheshi G, Vallieres L et al (2016) Dark microglia: A new phenotype  
699 predominantly associated with pathological states. *Glia* 64: 826-839 Doi  
700 10.1002/glia.22966
- 701 8 Bourdenx M, Bezard E, Dehay B (2014) Lysosomes and alpha-synuclein form a dangerous  
702 duet leading to neuronal cell death. *Front Neuroanat* 8: 83 Doi 10.3389/fnana.2014.00083
- 703 9 Bussi C, Ramos JM, Arroyo DS, Gaviglio EA, Gallea JI, Wang JM, Celej MS, Iribarren P (2017)  
704 Autophagy down regulates pro-inflammatory mediators in BV2 microglial cells and rescues  
705 both LPS and alpha-synuclein induced neuronal cell death. *Sci Rep* 7: 43153 Doi  
706 10.1038/srep43153
- 707 10 Celej MS, Sarroukh R, Goormaghtigh E, Fidelio GD, Ruyschaert J-M, Raussens V (2012)  
708 Toxic prefibrillar  $\alpha$ -synuclein amyloid oligomers adopt a distinctive antiparallel  $\beta$ -sheet  
709 structure. *Biochemical journal* 443: 719-726
- 710 11 Chang C, Lang H, Geng N, Wang J, Li N, Wang X (2013) Exosomes of BV-2 cells induced by  
711 alpha-synuclein: important mediator of neurodegeneration in PD. *Neurosci Lett* 548: 190-  
712 195 Doi 10.1016/j.neulet.2013.06.009
- 713 12 Cirman T, Oresic K, Mazovec GD, Turk V, Reed JC, Myers RM, Salvesen GS, Turk B (2004)  
714 Selective disruption of lysosomes in HeLa cells triggers apoptosis mediated by cleavage of  
715 Bid by multiple papain-like lysosomal cathepsins. *J Biol Chem* 279: 3578-3587 Doi  
716 10.1074/jbc.M308347200
- 717 13 de Chaumont F, Dallongeville S, Chenouard N, Herve N, Pop S, Provoost T, Meas-Yedid V,  
718 Pankajakshan P, Lecomte T, Le Montagner Y et al (2012) Icy: an open bioimage informatics  
719 platform for extended reproducible research. *Nat Methods* 9: 690-696 Doi  
720 10.1038/nmeth.2075

- 721 14 Degenhardt K, Mathew R, Beaudoin B, Bray K, Anderson D, Chen G, Mukherjee C, Shi Y,  
722 Gelinis C, Fan Yet al (2006) Autophagy promotes tumor cell survival and restricts necrosis,  
723 inflammation, and tumorigenesis. *Cancer Cell* 10: 51-64 Doi 10.1016/j.ccr.2006.06.001
- 724 15 Di Maio R, Barrett PJ, Hoffman EK, Barrett CW, Zharikov A, Borah A, Hu X, McCoy J, Chu CT,  
725 Burton EA et al (2016) alpha-Synuclein binds to TOM20 and inhibits mitochondrial protein  
726 import in Parkinson's disease. *Sci Transl Med* 8: 342ra378 Doi  
727 10.1126/scitranslmed.aaf3634
- 728 16 Droga-Mazovec G, Bojic L, Petelin A, Ivanova S, Romih R, Repnik U, Salvesen GS, Stoka V,  
729 Turk V, Turk B (2008) Cysteine cathepsins trigger caspase-dependent cell death through  
730 cleavage of bid and antiapoptotic Bcl-2 homologues. *J Biol Chem* 283: 19140-19150 Doi  
731 10.1074/jbc.M802513200
- 732 17 Dunn WA, Jr. (1990) Studies on the mechanisms of autophagy: formation of the  
733 autophagic vacuole. *J Cell Biol* 110: 1923-1933
- 734 18 Dunn WA, Jr. (1990) Studies on the mechanisms of autophagy: maturation of the  
735 autophagic vacuole. *J Cell Biol* 110: 1935-1945
- 736 19 Dupont N, Nascimbeni AC, Morel E, Codogno P (2017) Molecular Mechanisms of  
737 Noncanonical Autophagy. *Int Rev Cell Mol Biol* 328: 1-23 Doi  
738 10.1016/bs.ircmb.2016.08.001
- 739 20 Esteves AR, Arduino DM, Silva DF, Oliveira CR, Cardoso SM (2011) Mitochondrial  
740 Dysfunction: The Road to Alpha-Synuclein Oligomerization in PD. *Parkinsons Dis* 2011:  
741 693761 Doi 10.4061/2011/693761
- 742 21 Flavin WP, Bousset L, Green ZC, Chu Y, Skarpathiotis S, Chaney MJ, Kordower JH, Melki R,  
743 Campbell EM (2017) Endocytic vesicle rupture is a conserved mechanism of cellular  
744 invasion by amyloid proteins. *Acta Neuropathol*: Doi 10.1007/s00401-017-1722-x
- 745 22 Florey O, Kim SE, Sandoval CP, Haynes CM, Overholtzer M (2011) Autophagy machinery  
746 mediates macroendocytic processing and entotic cell death by targeting single  
747 membranes. *Nat Cell Biol* 13: 1335-1343 Doi 10.1038/ncb2363
- 748 23 Frake RA, Ricketts T, Menzies FM, Rubinsztein DC (2015) Autophagy and  
749 neurodegeneration. *J Clin Invest* 125: 65-74 Doi 10.1172/JCI73944
- 750 24 Freeman D, Cedillos R, Choyke S, Lukic Z, McGuire K, Marvin S, Burrage AM, Sudholt S,  
751 Rana A, O'Connor Cet al (2013) Alpha-synuclein induces lysosomal rupture and cathepsin  
752 dependent reactive oxygen species following endocytosis. *PLoS One* 8: e62143 Doi  
753 10.1371/journal.pone.0062143
- 754 25 Green DR, Levine B (2014) To be or not to be? How selective autophagy and cell death  
755 govern cell fate. *Cell* 157: 65-75 Doi 10.1016/j.cell.2014.02.049
- 756 26 Hara T, Nakamura K, Matsui M, Yamamoto A, Nakahara Y, Suzuki-Migishima R, Yokoyama  
757 M, Mishima K, Saito I, Okano Het al (2006) Suppression of basal autophagy in neural cells  
758 causes neurodegenerative disease in mice. *Nature* 441: 885-889 Doi 10.1038/nature04724
- 759 27 Hara T, Takamura A, Kishi C, Iemura S, Natsume T, Guan JL, Mizushima N (2008) FIP200, a  
760 ULK-interacting protein, is required for autophagosome formation in mammalian cells. *J*  
761 *Cell Biol* 181: 497-510 Doi 10.1083/jcb.200712064
- 762 28 Hayashi-Nishino M, Fujita N, Noda T, Yamaguchi A, Yoshimori T, Yamamoto A (2009) A  
763 subdomain of the endoplasmic reticulum forms a cradle for autophagosome formation.  
764 *Nat Cell Biol* 11: 1433-1437 Doi 10.1038/ncb1991
- 765 29 Higashi S, Moore DJ, Minegishi M, Kasanuki K, Fujishiro H, Kabuta T, Togo T, Katsuse O,  
766 Uchikado H, Furukawa Yet al (2011) Localization of MAP1-LC3 in vulnerable neurons and  
767 Lewy bodies in brains of patients with dementia with Lewy bodies. *J Neuropathol Exp*  
768 *Neurol* 70: 264-280 Doi 10.1097/NEN.0b013e318211c86a

- 769 30 Hoffmann A, Ertle B, Bruno A, Kulinich A, Hoffmann AC, von Wittgenstein J, Winkler J,  
770 Xiang W, Schlachetzki JC (2016) Alpha-synuclein activates BV2 microglia dependent on its  
771 aggregation state. *Biochem Biophys Res Commun* 479: 881-886 Doi  
772 10.1016/j.bbrc.2016.09.109
- 773 31 Hu Z, Yang B, Mo X, Xiao H (2015) Mechanism and Regulation of Autophagy and Its Role in  
774 Neuronal Diseases. *Mol Neurobiol* 52: 1190-1209 Doi 10.1007/s12035-014-8921-4
- 775 32 Karanasios E, Ktistakis NT (2015) Live-cell imaging for the assessment of the dynamics of  
776 autophagosome formation: focus on early steps. *Methods* 75: 54-60 Doi  
777 10.1016/j.ymeth.2014.12.007
- 778 33 Komatsu M, Waguri S, Chiba T, Murata S, Iwata J, Tanida I, Ueno T, Koike M, Uchiyama Y,  
779 Kominami E et al (2006) Loss of autophagy in the central nervous system causes  
780 neurodegeneration in mice. *Nature* 441: 880-884 Doi 10.1038/nature04723
- 781 34 Kremer JR, Mastronarde DN, McIntosh JR (1996) Computer visualization of three-  
782 dimensional image data using IMOD. *J Struct Biol* 116: 71-76 Doi 10.1006/jsbi.1996.0013
- 783 35 Ktistakis NT, Karanasios E, Manifava M (2014) Dynamics of autophagosome formation: a  
784 pulse and a sequence of waves. *Biochem Soc Trans* 42: 1389-1395 Doi  
785 10.1042/BST20140183
- 786 36 Ktistakis NT, Tooze SA (2016) Digesting the Expanding Mechanisms of Autophagy. *Trends*  
787 *Cell Biol* 26: 624-635 Doi 10.1016/j.tcb.2016.03.006
- 788 37 Kukulski W, Schorb M, Welsch S, Picco A, Kaksonen M, Briggs JA (2012) Precise, correlated  
789 fluorescence microscopy and electron tomography of lowicryl sections using fluorescent  
790 fiducial markers. *Methods Cell Biol* 111: 235-257 Doi 10.1016/B978-0-12-416026-2.00013-  
791 3
- 792 38 Lee HJ, Bae EJ, Lee SJ (2014) Extracellular alpha-synuclein-a novel and crucial factor in  
793 Lewy body diseases. *Nat Rev Neurol* 10: 92-98 Doi 10.1038/nrneurol.2013.275
- 794 39 Liang CC, Wang C, Peng X, Gan B, Guan JL (2010) Neural-specific deletion of FIP200 leads  
795 to cerebellar degeneration caused by increased neuronal death and axon degeneration. *J*  
796 *Biol Chem* 285: 3499-3509 Doi 10.1074/jbc.M109.072389
- 797 40 Liu J, Xia H, Kim M, Xu L, Li Y, Zhang L, Cai Y, Norberg HV, Zhang T, Furuya T et al (2011)  
798 Beclin1 controls the levels of p53 by regulating the deubiquitination activity of USP10 and  
799 USP13. *Cell* 147: 223-234 Doi 10.1016/j.cell.2011.08.037
- 800 41 Longhena F, Faustini G, Missale C, Pizzi M, Spano P, Bellucci A (2017) The Contribution of  
801 alpha-Synuclein Spreading to Parkinson's Disease Synaptopathy. *Neural Plast* 2017:  
802 5012129 Doi 10.1155/2017/5012129
- 803 42 Lumkwana D, du Toit A, Kinnear C, Loos B (2017) Autophagic flux control in  
804 neurodegeneration: Progress and precision targeting-Where do we stand? *Prog Neurobiol*:  
805 Doi 10.1016/j.pneurobio.2017.03.006
- 806 43 Maier O, Marvin SA, Wodrich H, Campbell EM, Wiethoff CM (2012) Spatiotemporal  
807 dynamics of adenovirus membrane rupture and endosomal escape. *J Virol* 86: 10821-  
808 10828 Doi 10.1128/JVI.01428-12
- 809 44 Martin LJ, Pan Y, Price AC, Sterling W, Copeland NG, Jenkins NA, Price DL, Lee MK (2006)  
810 Parkinson's disease alpha-synuclein transgenic mice develop neuronal mitochondrial  
811 degeneration and cell death. *J Neurosci* 26: 41-50 Doi 10.1523/JNEUROSCI.4308-05.2006
- 812 45 Martinez J, Almendinger J, Oberst A, Ness R, Dillon CP, Fitzgerald P, Hengartner MO, Green  
813 DR (2011) Microtubule-associated protein 1 light chain 3 alpha (LC3)-associated  
814 phagocytosis is required for the efficient clearance of dead cells. *Proc Natl Acad Sci U S A*  
815 108: 17396-17401 Doi 10.1073/pnas.1113421108

- 816 46 Martinez J, Malireddi RK, Lu Q, Cunha LD, Pelletier S, Gingras S, Orchard R, Guan JL, Tan H,  
817 Peng Jet al (2015) Molecular characterization of LC3-associated phagocytosis reveals  
818 distinct roles for Rubicon, NOX2 and autophagy proteins. *Nat Cell Biol* 17: 893-906 Doi  
819 10.1038/ncb3192
- 820 47 Mastronarde DN (2005) Automated electron microscope tomography using robust  
821 prediction of specimen movements. *J Struct Biol* 152: 36-51 Doi 10.1016/j.jsb.2005.07.007
- 822 48 Mazzulli JR, Zunke F, Isacson O, Studer L, Krainc D (2016) alpha-Synuclein-induced  
823 lysosomal dysfunction occurs through disruptions in protein trafficking in human midbrain  
824 synucleinopathy models. *Proc Natl Acad Sci U S A* 113: 1931-1936 Doi  
825 10.1073/pnas.1520335113
- 826 49 McGlinchey RP, Lee JC (2015) Cysteine cathepsins are essential in lysosomal degradation  
827 of alpha-synuclein. *Proc Natl Acad Sci U S A* 112: 9322-9327 Doi 10.1073/pnas.1500937112
- 828 50 Nikolettou V, Papandreou ME, Tavernarakis N (2015) Autophagy in the physiology  
829 and pathology of the central nervous system. *Cell Death Differ* 22: 398-407 Doi  
830 10.1038/cdd.2014.204
- 831 51 Nixon RA, Wegiel J, Kumar A, Yu WH, Peterhoff C, Cataldo A, Cuervo AM (2005) Extensive  
832 involvement of autophagy in Alzheimer disease: an immuno-electron microscopy study. *J*  
833 *Neuropathol Exp Neurol* 64: 113-122
- 834 52 Nuytemans K, Theuns J, Cruts M, Van Broeckhoven C (2010) Genetic etiology of Parkinson  
835 disease associated with mutations in the SNCA, PARK2, PINK1, PARK7, and LRRK2 genes: a  
836 mutation update. *Hum Mutat* 31: 763-780 Doi 10.1002/humu.21277
- 837 53 Osellame LD, Duchen MR (2014) Quality control gone wrong: mitochondria, lysosomal  
838 storage disorders and neurodegeneration. *Br J Pharmacol* 171: 1958-1972 Doi  
839 10.1111/bph.12453
- 840 54 Paul-Gilloteaux P, Heiligenstein X, Belle M, Domart MC, Larijani B, Collinson L, Raposo G,  
841 Salamero J (2017) eC-CLEM: flexible multidimensional registration software for correlative  
842 microscopies. *Nat Methods* 14: 102-103 Doi 10.1038/nmeth.4170
- 843 55 Peelaerts W, Bousset L, Van der Perren A, Moskalyuk A, Pulizzi R, Giugliano M, Van den  
844 Haute C, Melki R, Baekelandt V (2015) alpha-Synuclein strains cause distinct  
845 synucleinopathies after local and systemic administration. *Nature* 522: 340-344 Doi  
846 10.1038/nature14547
- 847 56 Ransohoff RM (2016) How neuroinflammation contributes to neurodegeneration. *Science*  
848 353: 777-783 Doi 10.1126/science.aag2590
- 849 57 Repnik U, Hafner Cesen M, Turk B (2014) Lysosomal membrane permeabilization in cell  
850 death: concepts and challenges. *Mitochondrion* 19 Pt A: 49-57 Doi  
851 10.1016/j.mito.2014.06.006
- 852 58 Sanchez-Guajardo V, Tentillier N, Romero-Ramos M (2015) The relation between alpha-  
853 synuclein and microglia in Parkinson's disease: Recent developments. *Neuroscience* 302:  
854 47-58 Doi 10.1016/j.neuroscience.2015.02.008
- 855 59 Shamas-Din A, Kale J, Leber B, Andrews DW (2013) Mechanisms of action of Bcl-2 family  
856 proteins. *Cold Spring Harb Perspect Biol* 5: a008714 Doi 10.1101/cshperspect.a008714
- 857 60 Sundblad V, Croci DO, Rabinovich GA (2011) Regulated expression of galectin-3, a  
858 multifunctional glycan-binding protein, in haematopoietic and non-haematopoietic  
859 tissues. *Histol Histopathol* 26: 247-265 Doi 10.14670/HH-26.247
- 860 61 Tait SW, Green DR (2010) Mitochondria and cell death: outer membrane permeabilization  
861 and beyond. *Nat Rev Mol Cell Biol* 11: 621-632 Doi 10.1038/nrm2952



862 62 Thurston TL, Wandel MP, von Muhlinen N, Foeglein A, Randow F (2012) Galectin 8 targets  
863 damaged vesicles for autophagy to defend cells against bacterial invasion. *Nature* 482:  
864 414-418 Doi 10.1038/nature10744  
865 63 Uchimoto T, Nohara H, Kamehara R, Iwamura M, Watanabe N, Kobayashi Y (1999)  
866 Mechanism of apoptosis induced by a lysosomotropic agent, L-Leucyl-L-Leucine methyl  
867 ester. *Apoptosis* 4: 357-362  
868 64 Webb JL, Ravikumar B, Atkins J, Skepper JN, Rubinsztein DC (2003) Alpha-Synuclein is  
869 degraded by both autophagy and the proteasome. *J Biol Chem* 278: 25009-25013 Doi  
870 10.1074/jbc.M300227200  
871 65 Xilouri M, Brekk OR, Stefanis L (2016) Autophagy and Alpha-Synuclein: Relevance to  
872 Parkinson's Disease and Related Synucleopathies. *Mov Disord* 31: 178-192 Doi  
873 10.1002/mds.26477  
874 66 Xiong S, Mu T, Wang G, Jiang X (2014) Mitochondria-mediated apoptosis in mammals.  
875 *Protein Cell* 5: 737-749 Doi 10.1007/s13238-014-0089-1  
876  
877  
878  
879  
880  
881  
882  
883  
884  
885  
886  
887  
888  
889  
890  
891  
892  
893

894 **Figure legends**

895

896 **Figure 1.**

897 **Alpha-synuclein induces autophagy in microglial cells**

898 (A) BV2 microglial cells were left untreated or stimulated at different time points with AS  
899 monomers (m) or fibrils (f) at 5uM. Cells were then fixed and stained for LC3. (B) Cell  
900 lysates from BV2 cells cultured with AS fibrils or monomers (5 uM) were collected at  
901 different time points and LC3B and  $\beta$ -Actin protein levels were examined by Western  
902 immunoblotting. Bafilomycin A1 (BAF) was added for the last 3h. (C) Quantification of  
903 LC3-II from (D) relative to  $\beta$ -Actin by densitometry. BV2 GFP-LC3 cells (D, E) or primary  
904 microglial cells (F, H) were left untreated or stimulated with Alexa Fluor 647-labeled AS  
905 fibrils (5uM). After 12h cells were immunostained with anti-Lamp1 (red) antibody and  
906 primary microglial cells were also stained for LC3. Images shown are z-stack projections.  
907 (G) and (I) are 3D surface-rendered magnifications of the selected area above. (J, K) LC3  
908 positive vesicles in unstimulated or treated BV2 (J) and primary microglial cells (K) were  
909 determined using ImageJ particle counting plugin after cell deconvolution (n=20). Results  
910 from at least three independent experiments were analysed by one-way ANOVA followed  
911 by Post-Hoc Dunnet's test; n = 3. Error bars represent SEM (\*\*\*, P < 0.001), pMC: primary  
912 microglial cells.

913

914 **Figure 2.**

915 **Evaluation of LC3 and ATG13 dynamics in AS-stimulated microglial cells by live-**

916 **imaging.** A, B. BV2 cells stably expressing GFP-LC3 (green) were stimulated with fAS  
917 (red) for 12h. Imaging was performed at 1 frame per 10 s during 1h and a selected interval  
918 within this sequence is shown. LysoTracker Blue was added 30 min previous to imaging  
919 acquisition. Note that autophagosomes form a ring-like structure around LysoTracker+/  
920



920 fAS+ structures. C, D. BV2 cells stably expressing GFP-ATG13 (green) were transfected  
921 with CFP-LC3 (red) and stimulated with fAS (blue) and imaged as described above.  
922 Arrowhead indicates the first discernible ATG13 punctum during autophagosome  
923 formation (C) and ATG13 forming a puncta pattern similar to LC3 (D).

924

925 **Figure 3.**

926 **Correlative Light-Electron Microscopy study of LC3 positive vesicles in fAS-**  
927 **stimulated microglial cells.** BV2 GFP-LC3 (green) cells were stimulated with fAS (red)  
928 for 12 h and incubated in the presence (G-J) or the absence (A-F) of BAF for the last 3h.  
929 Cells were then fixed by High Pressure Freezing (HPF) and processed for Optical and  
930 Electron Microscopy (EM) acquisition. 300 nm sections were imaged by fluorescence  
931 microscopy and EM tomograms were acquired at the regions of interest. (A) shows  
932 widefield and low (200X) and high-magnification (20000X) electron microscopy images  
933 with the overlay result. (B-J) show high-magnification slides (20000X) from representative  
934 tomograms of different cells indicating the overlay result (scale bar, 200nm). Arrowheads  
935 indicate double membrane vesicles.

936

937 **Figure 4.**

938 **Live-CLEM imaging of fAS-stimulated microglial cells.**

939 (A) BV2 GFP-LC3 cells (green) were stimulated with fAS (red) for 12h. Imaging was  
940 performed at 1 frame per 20 s. After detecting the event of interest (white box), cells were  
941 immediately fixed and processed for EM tomography. Twenty serial tomograms were  
942 acquired on 300nm sections. (B) and (D) show the overlay result indicating the area  
943 acquired at high magnification (9400X) in each tomogram. (E) representative slides of the  
944 serial tomogram are shown (scale bar, 500nm). Arrowhead indicates a central double  
945 membrane autophagosome. (C, G). Correlation result of a second live-CLEM experiment

946 indicating the area acquired at high-magnification (9400X) in each serial tomogram. BV2  
947 GFP-LC3 cells were stimulated and imaged as described above. Representative  
948 tomogram slides are shown in (H). Black arrowheads indicate a double-membrane  
949 autophagosome surrounded by ER membranes (white arrows). (F) and (I) are 3D  
950 reconstructions of the vesicles shown in each serial tomogram's slides.

951

## 952 **Figure 5.**

### 953 **Evaluation of lysosomal damage in fAS-stimulated microglial cells.**

954 (A, B). BV2 cells were left untreated (A) or stimulated (B) with LLOME (500  $\mu$ M) for 2h.  
955 After that, cells were immunostained with anti-Gal3 (green) and anti-Lamp1 (red)  
956 antibodies. (C, D, E) BV2 (C) or primary microglial cells (D, E) were treated with fAS for  
957 12h. Cells were then fixed and stained for Gal-3 and Lamp-1 or LC3, as indicated. Merged  
958 images show orthogonal views and colocalization analysis between the specified labels.  
959 Pearson coefficient (R) and Overlap coefficient (R[r]) are listed.

960

## 961 **Figure 6.**

### 962 **Effects of fAS stimulation on Cathepsin-B activity, mitochondrial quality and** 963 **microglial cell survival.**

964 BV2 cells were stimulated with fAS at different time points. Microglial cells were then  
965 stained with MagicRed dye for evaluation of Cathepsin-B activity (A), MitoSpy Green FM  
966 for measuring mitochondrial mass or MitoSpy Orange CMTMRos for assessing  
967 mitochondrial membrane potential changes (B). Graphs show quantification of mean  
968 fluorescence intensity (Gmean) by flow cytometry. C, D. BV2 microglial cells (C) or primary  
969 microglial cells (D) were left untreated or treated with spautin-1 (10  $\mu$ M) for 24h or FIP200  
970 siRNA for 48h. Cells were then stimulated with fAS (5 $\mu$ M) for 24h and cell death was  
971 evaluated using propidium iodide (PI) combined with AnnexinV-FITC staining and

972 subsequent flow cytometric analysis. Percentages of AnnexinV-FITC/IP double positive  
973 dead cells are shown. (E) BV2 microglial cells were treated and stimulated as described in  
974 (C) and Bcl-2, Bcl-xL and cleaved caspase-3 protein levels were evaluated by flow  
975 cytometry. Graphs show representative histograms for each protein. (F) BV2 microglial  
976 cells were left untreated or treated with spautin-1 (10  $\mu$ M) for 24h or FIP200 siRNA for 48h  
977 and stimulated with fAS (5uM) for 24h. Mitochondrial mass and membrane potential were  
978 measured as described above (A, B). Results were analyzed by one-way ANOVA  
979 followed by Post-Hoc Dunnet's test; n = 3. Error bars represent SEM (\*, P < 0.05; \*\*, P <  
980 0.01; \*\*\*, P < 0.001).

981

#### 982 **Figure S1.**

##### 983 **Autophagy dynamics of fAS-stimulated BV2 GFP-LC3 cells during early time points.**

984 A, B, C. BV2 GFP-LC3 (green) cells were stimulated with fAS (5uM, red) for 1h. Imaging  
985 started immediately after cellular stimulation and it was performed at 1 frame per 10 s  
986 during 1h, a selected interval within this sequence is shown. (C) shows fAS (red) and  
987 LysoTracker staining (green) of BV2 GFP-LC3 cells stimulated and imaged as described  
988 above. Of note that synuclein/LysoTracker colocalization is quickly observable after  
989 cellular internalization. D, E. BV2 GFP-LC3 (green) cells were stimulated with fAS (red) for  
990 6h and imaged at 1 frame per 10 s during 1h, a selected interval within this sequence is  
991 shown.

992

#### 993 **Figure S2.**

994 (A) Primary microglial cells were stimulated with fAS for 12h and co-localization between  
995 lysosomal specific marker GALNS and fAS was analysed by confocal microscopy.  
996 Pearson coefficient (R) and Overlap coefficient (R[r]) are listed. (B) LC3 positive vesicles in  
997 BV2 GFP-LC3 cells treated with the mTOR inhibitor PP242 (100uM) for 3h in the presence

998 or the absence of spautin-1 (10  $\mu$ M) or siRNA FIP200 were determined using ImageJ  
999 particle counting plugin. Spautin-1 and siRNA FIP200 were added 24h and 48 h before  
1000 autophagy stimulation, respectively. Control treatments were used in the same conditions.  
1001 (C) Representative Immunofluorescence images of BV2 GFP-LC3 treated as described in  
1002 B. (D) primary microglial cells were cultured in the presence or the absence of spautin-1  
1003 (10  $\mu$ M) or siRNA FIP200 and stimulated with fAS (red, 5 $\mu$ M). After 12h cells were  
1004 immunostained for LC3 (green) and confocal images after cellular deconvolution are  
1005 shown. (E) TEM of fAS (scale bar, 200nm). (F, G) BV2 microglial cells were stimulated  
1006 with fAS at the indicated time points. After that, cells were immunostained for GAL-3 and  
1007 puncta formation were determined using ImageJ particle counting plugin (E). Results were  
1008 analysed by one-way ANOVA followed by Post-Hoc Dunnet's test; n = 3. Error bars  
1009 represent SEM (\*\*, P < 0.01; \*\*\*, P < 0.001).

1010

1011 **Figure S3. Comparison of single and double-membrane vesicles found in control**  
1012 **and fAS-stimulated BV2 microglial cells.**

1013 A, B. Representative images from EM tomograms of control (A) and fAS-stimulated (B)  
1014 BV2 GFP-LC3 microglial cells showing different single and double membrane AV (scale  
1015 bar, 500nm). (C) Graphs show the AV size quantification in both conditions. Results were  
1016 analyzed by one-way ANOVA followed by Post-Hoc Dunnet's test; n = 30. Error bars  
1017 represent SEM (\*, P < 0.05; \*\*, P < 0.01).

1018

1019 **Supplementary Videos**

1020 (SV1-SV9) Video files showing autophagy dynamics at different time points after fAS  
1021 stimulation of BV2 microglial cells.

1022 SV1, SV2. BV2 GFP-LC3 cells were stimulated with fAS for 12h and imaged at 1 frame  
1023 per 10 s during 1h. SV1 and SV2 correspond to the sequence shown in Fig. 2A and Fig.

1024 2B, respectively. Of note that LC3 (green) forms a ring-like structure around fAS (red).  
1025 LysoTracker (blue) was used for lysosomal staining.  
1026 SV3, SV4. BV2 cells stably expressing ATG13 (green) were co-transfected with CFP-LC3  
1027 plasmid (red). Microglial cells were stimulated with fAS (blue) for 12h and imaged at 1  
1028 frame per 10 s during 1h. SV3 and SV4 correspond to sequence shown in Fig. 2C and Fig.  
1029 2D, respectively. Of note that ATG13-positive structures mature into LC3-positive vesicles.  
1030 SV5. BV2 GFP-LC3 cells were stimulated with fAS (red) and imaged immediately after  
1031 stimulation for 1h. LysoTracker (green) was used for lysosomal staining.  
1032 SV6, SV7, SV8, SV9. BV2 GFP-LC3 cells (green) were stimulated with fAS (red) and  
1033 imaged immediately (SV6 and SV7) or 6h after stimulation (SV8, SV9). Of note that no  
1034 significant change in the dynamics of autophagy is detected over time, unlike long-term  
1035 stimulation.  
1036 SV10 – SV13. EM tomograms from fAS-stimulated microglial cells.  
1037 EM high-magnification (20000X) tomograms corresponding to the images indicated as Fig.  
1038 3A (SV10), Fig. 3B (SV11), Fig. 3E (SV12) and Fig. 3G (SV13) are shown as video files.  
1039 Of note, the presence of double membrane autophagosomes.  
1040 SV14, SV15. Live imaging video file (SV14) and serial tomogram and 3D model (SV15)  
1041 corresponding to Fig 4A and Fig. 4E, respectively. Tomograms of twenty consecutive  
1042 300nm sections were acquired at 9400X magnification and later aligned. SV15 shows a  
1043 central double-membrane autophagosome containing several vesicles.  
1044 SV16, SV17. Live imaging video file (SV16) and serial tomogram and 3D model (SV17)  
1045 corresponding to Fig 4C and Fig. 4H, respectively. SV17 shows an inner autophagosome  
1046 and multiple ER membranes surrounding it, suggesting it is an immature AV. Of note, an  
1047 additional concentric structure exhibiting a dense core is also exhibited.

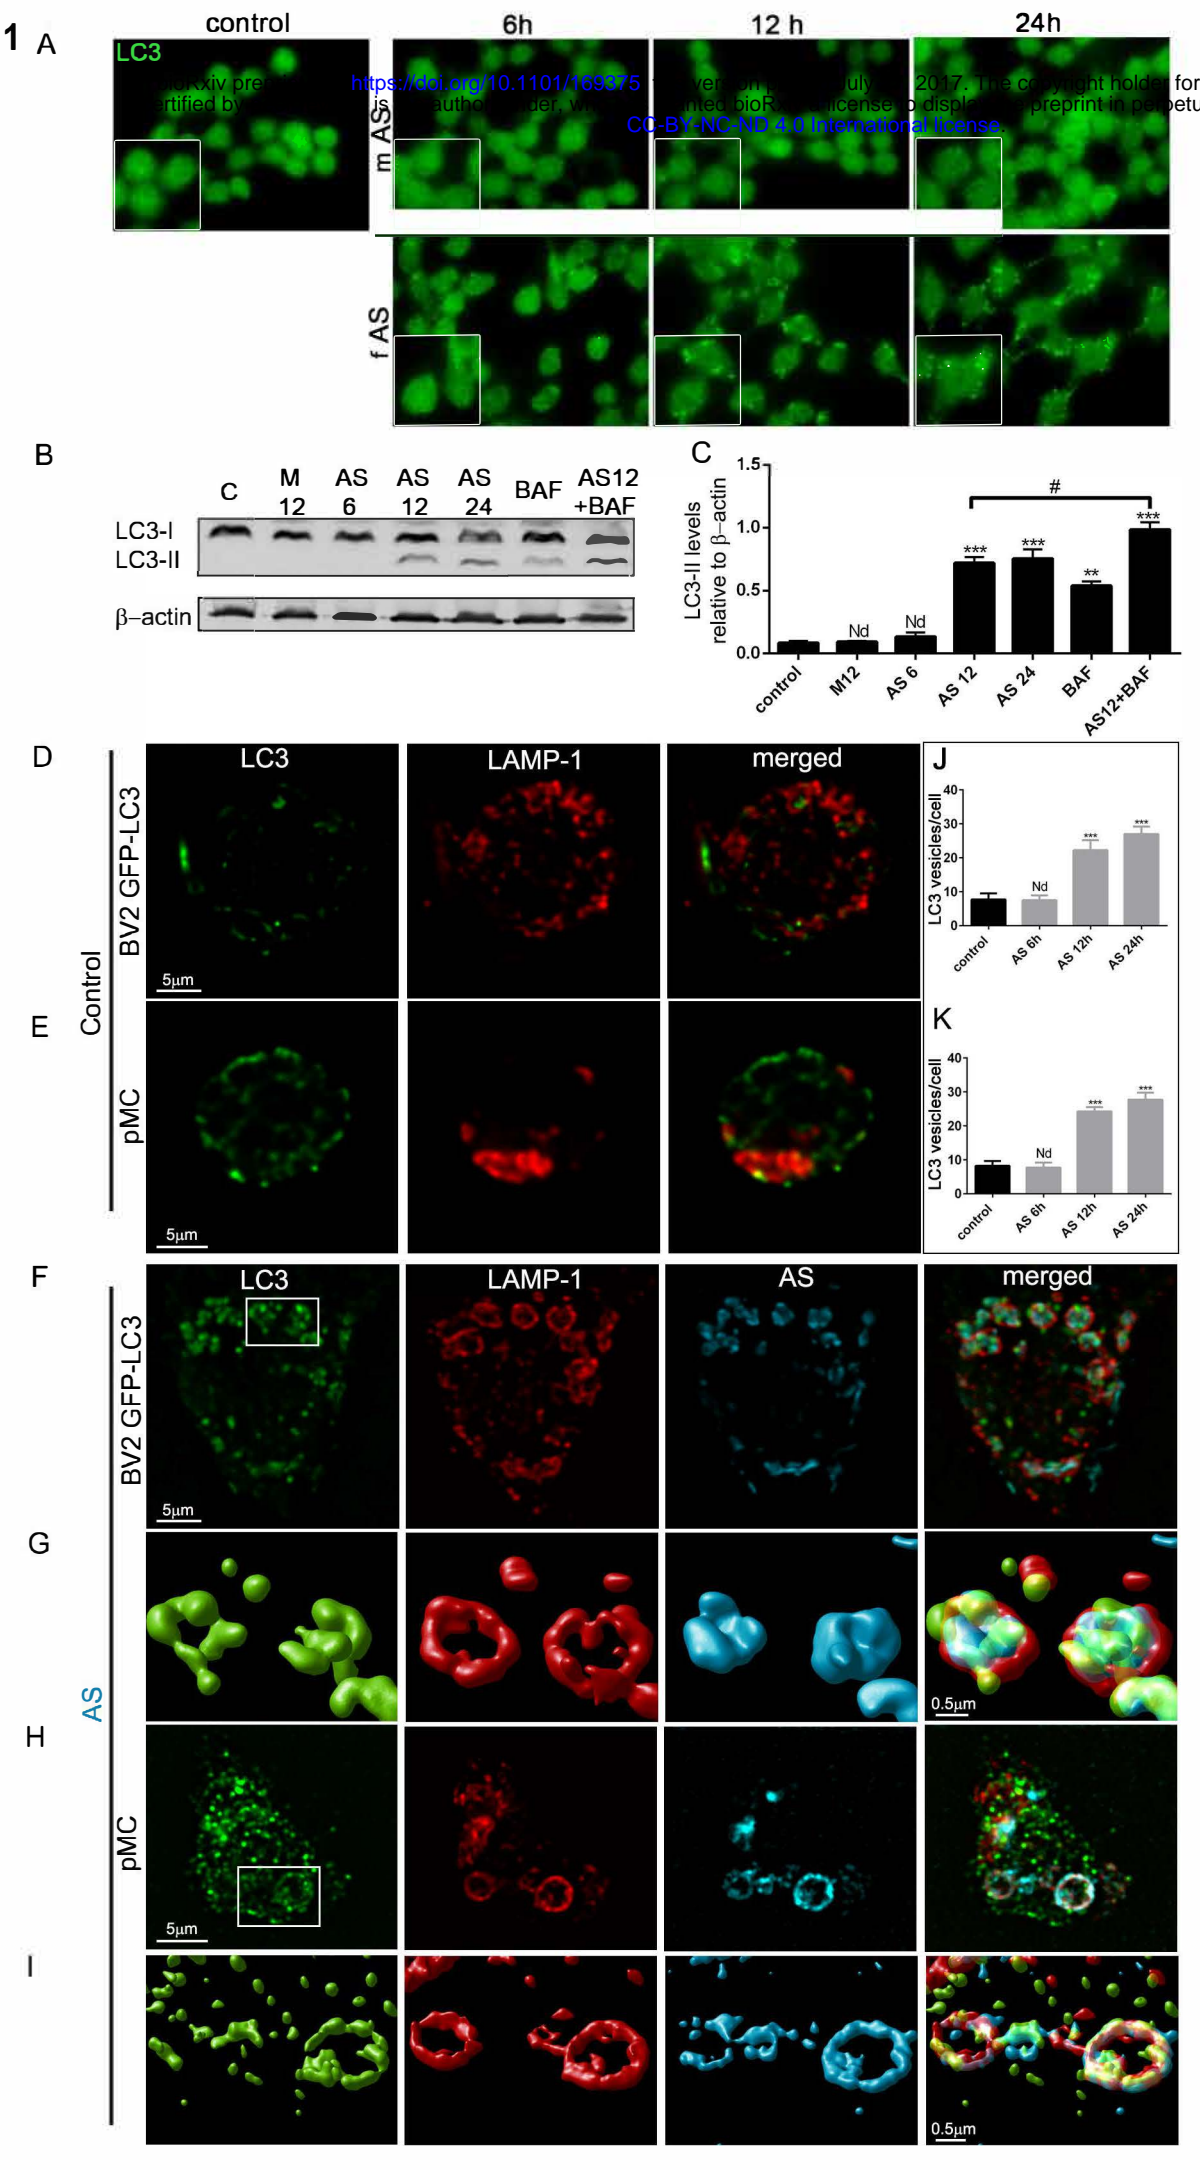



2

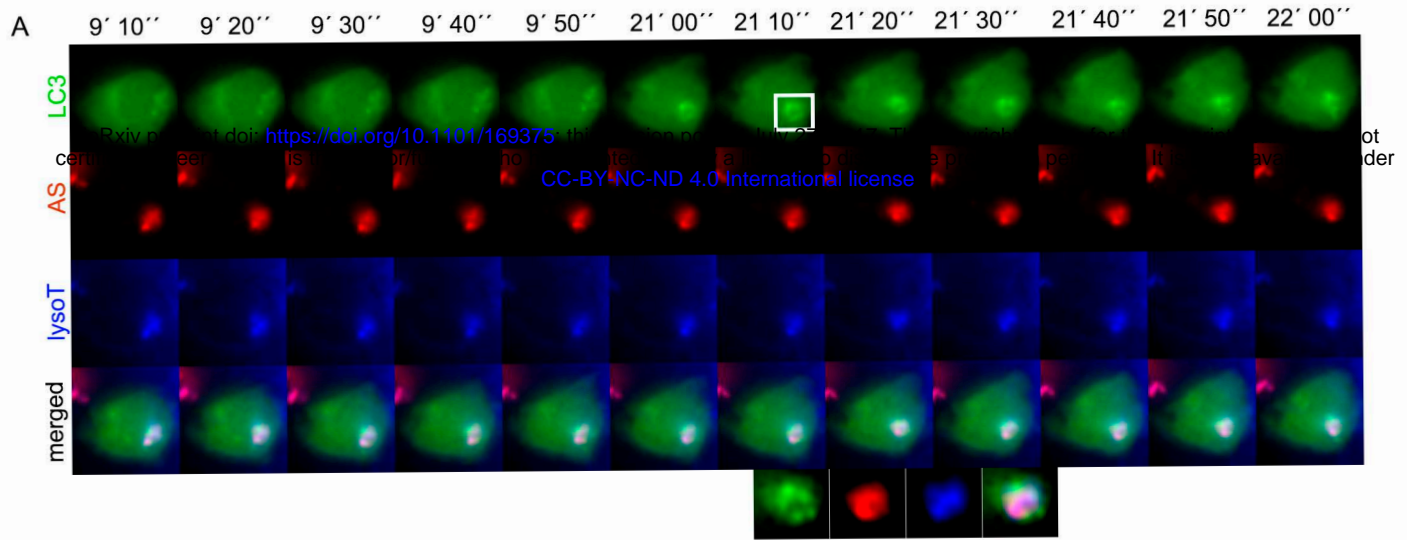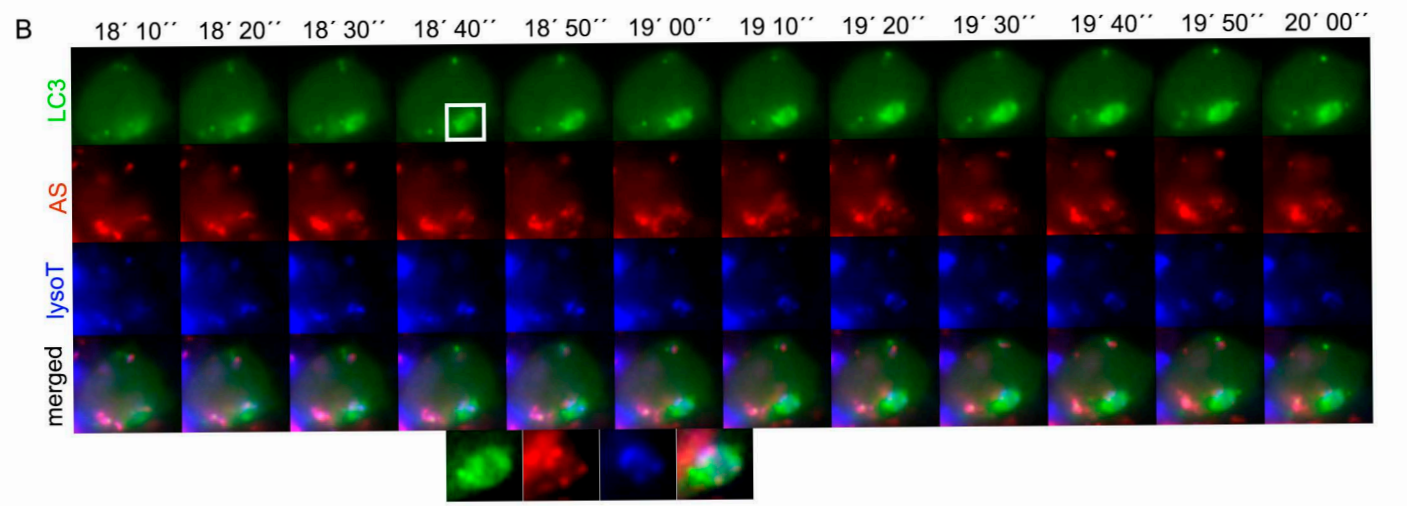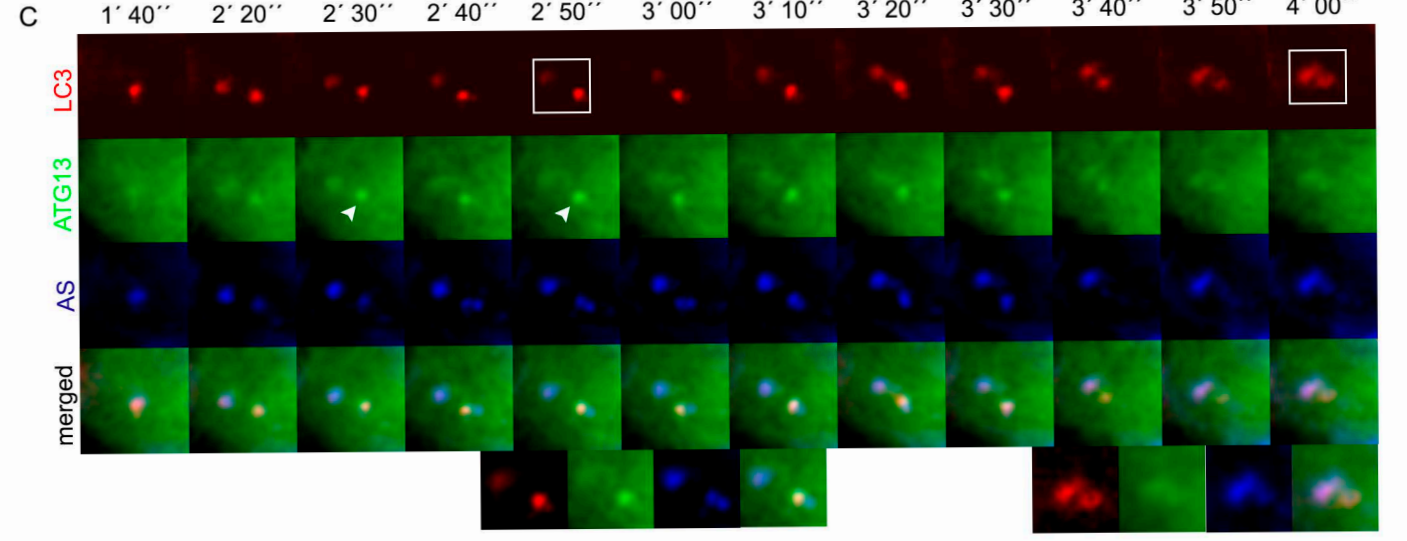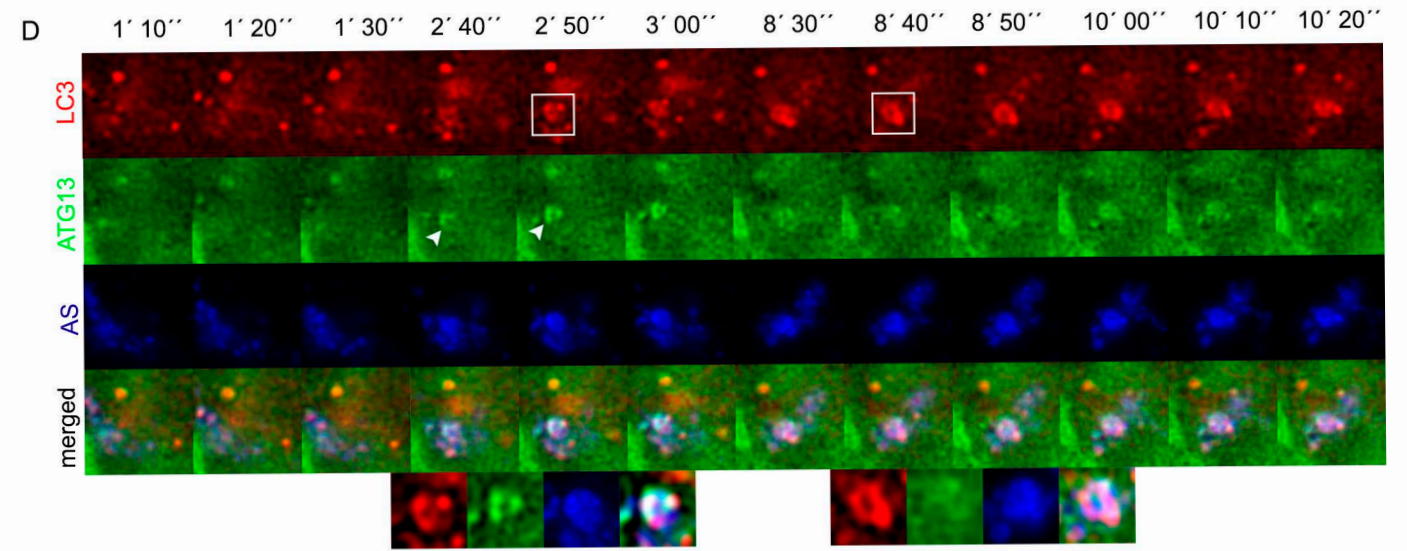



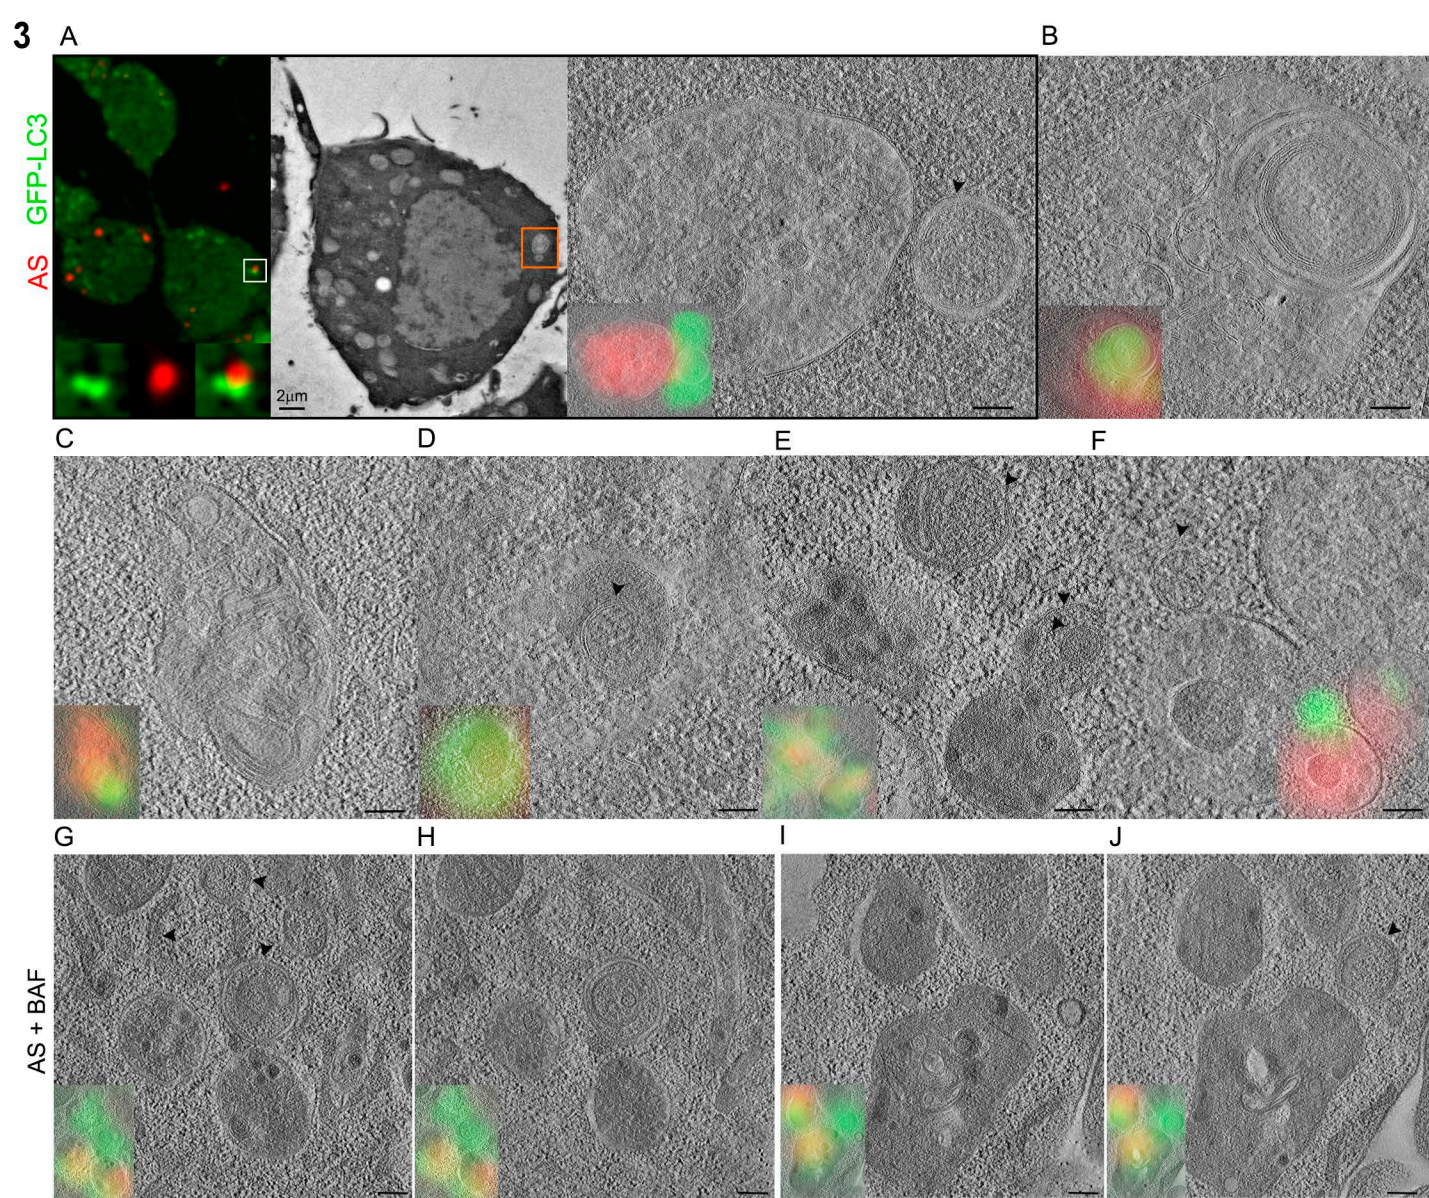



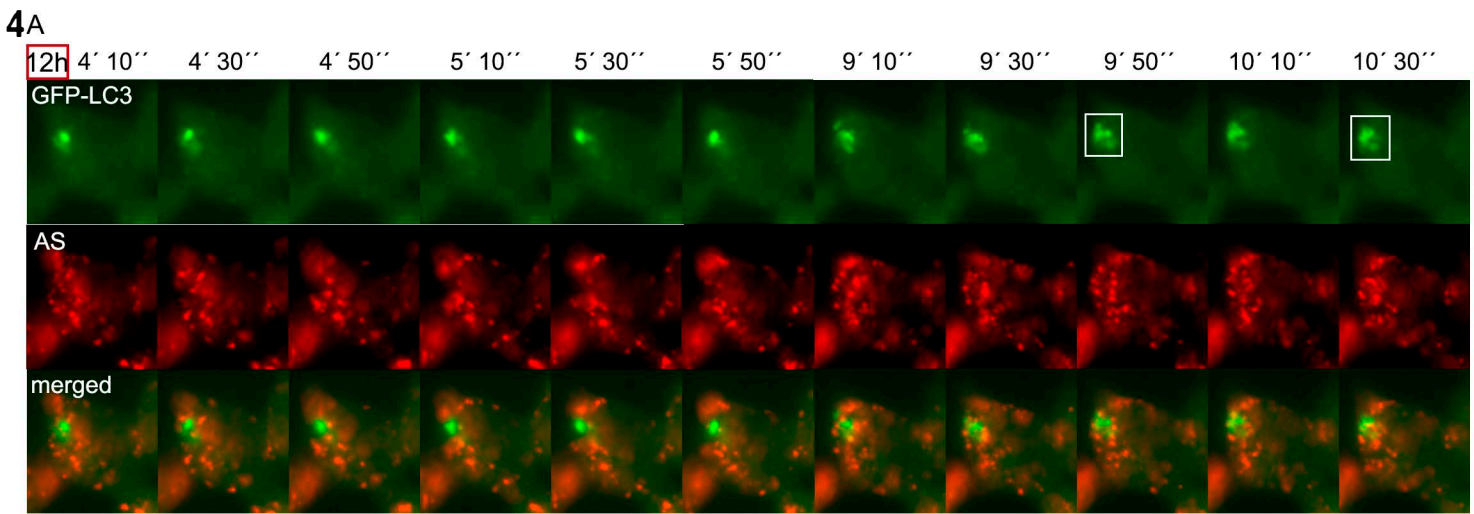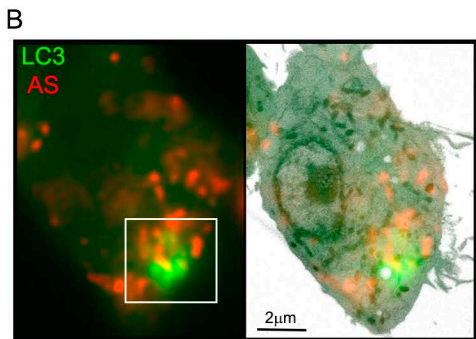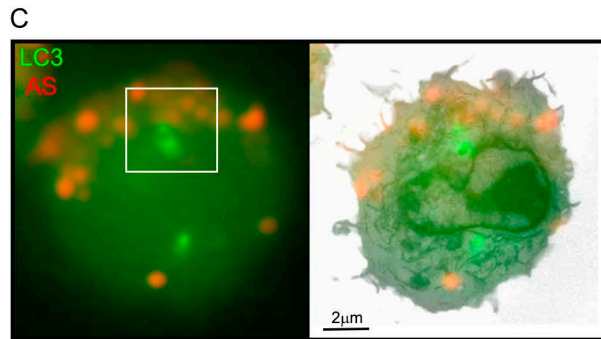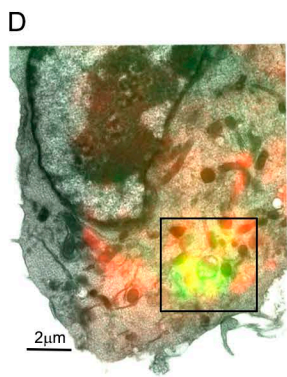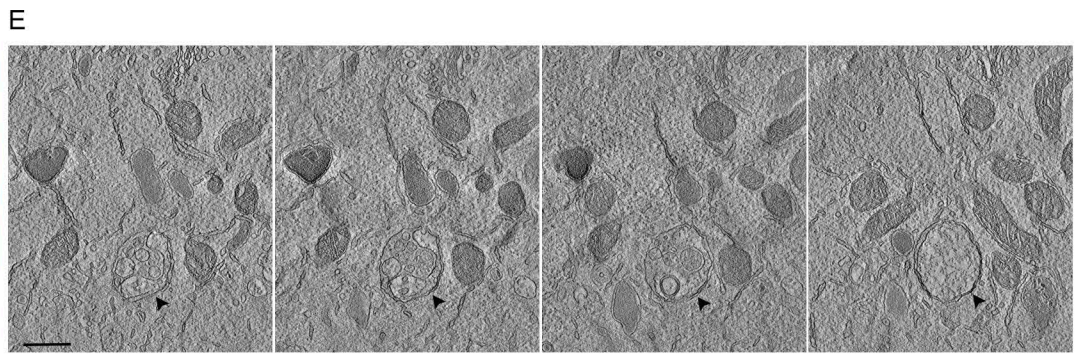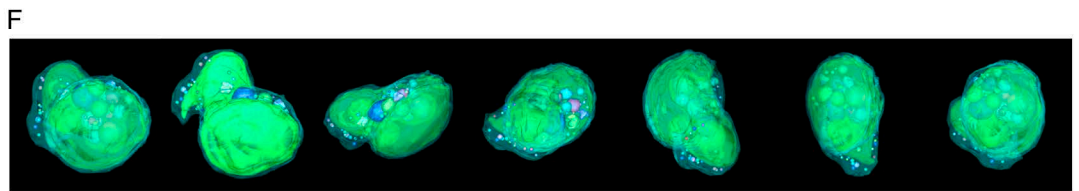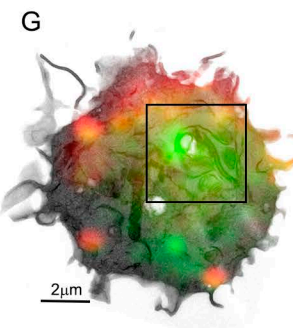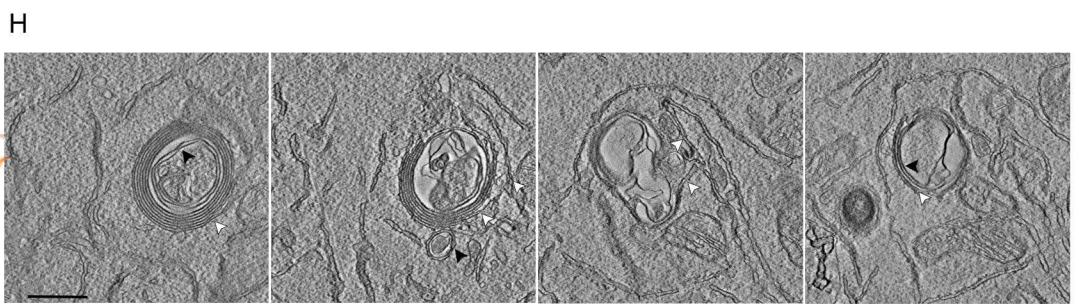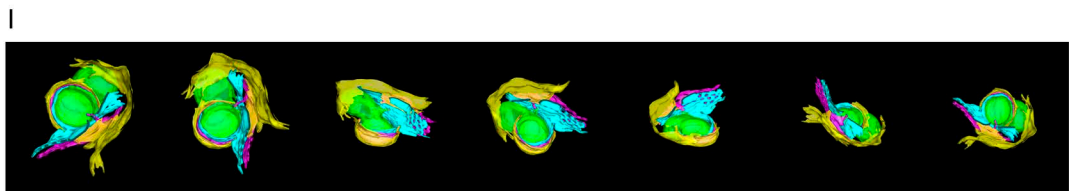

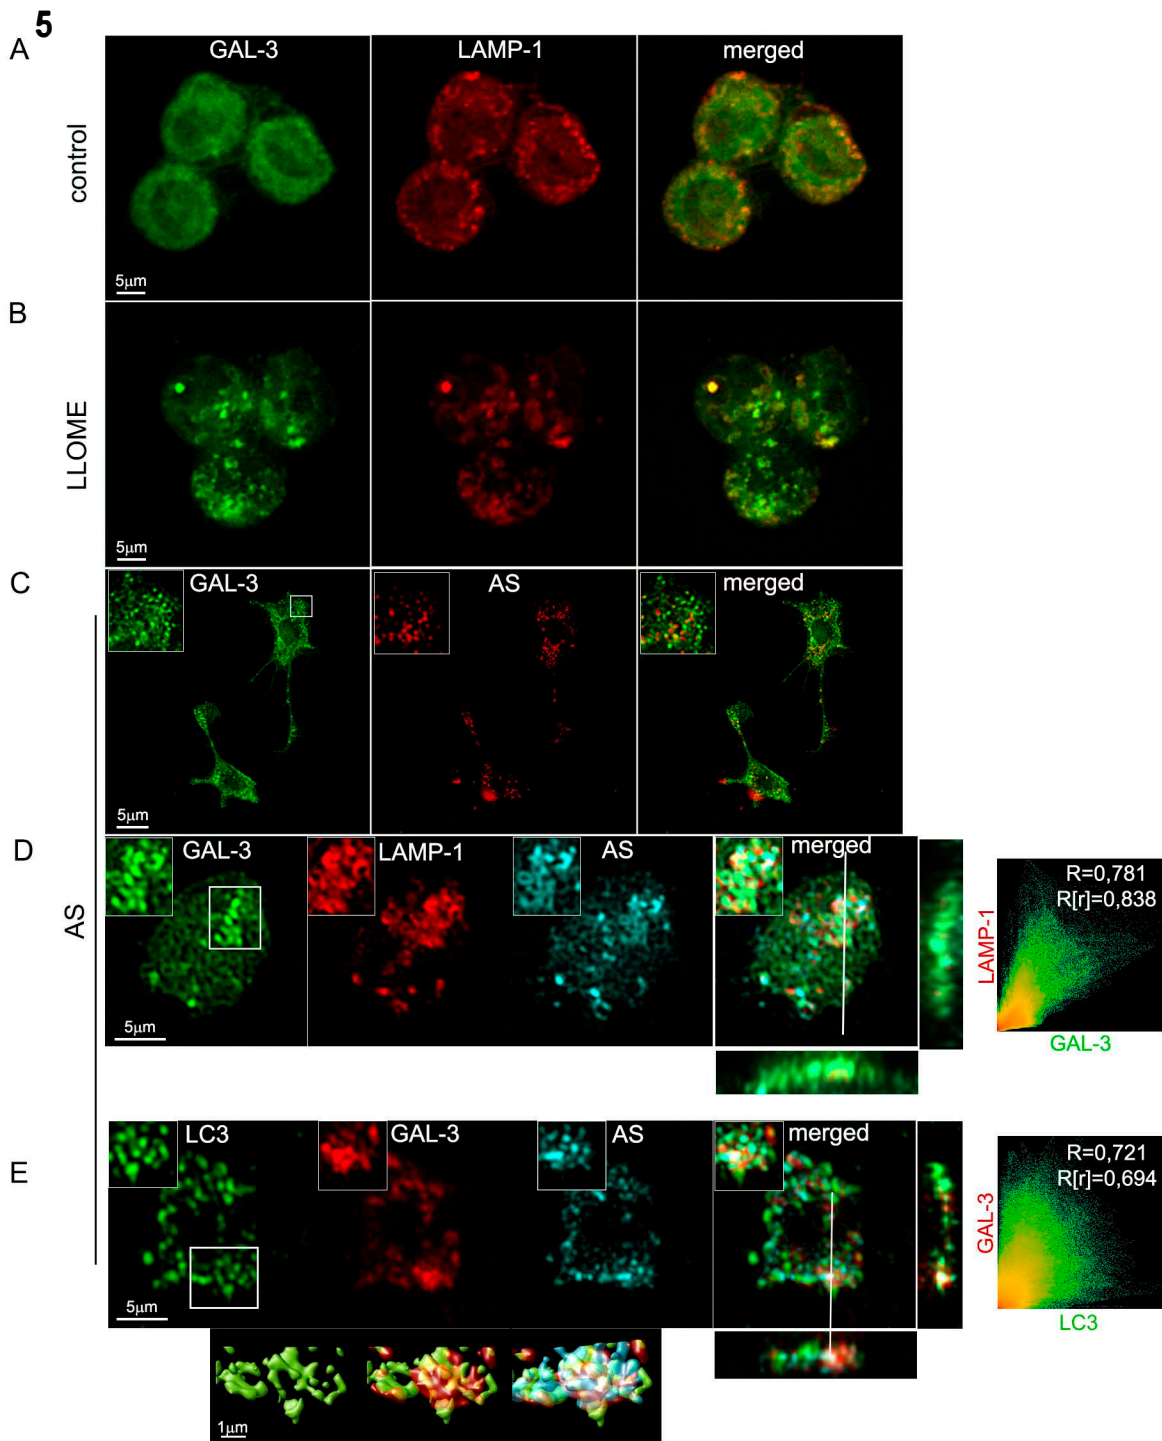

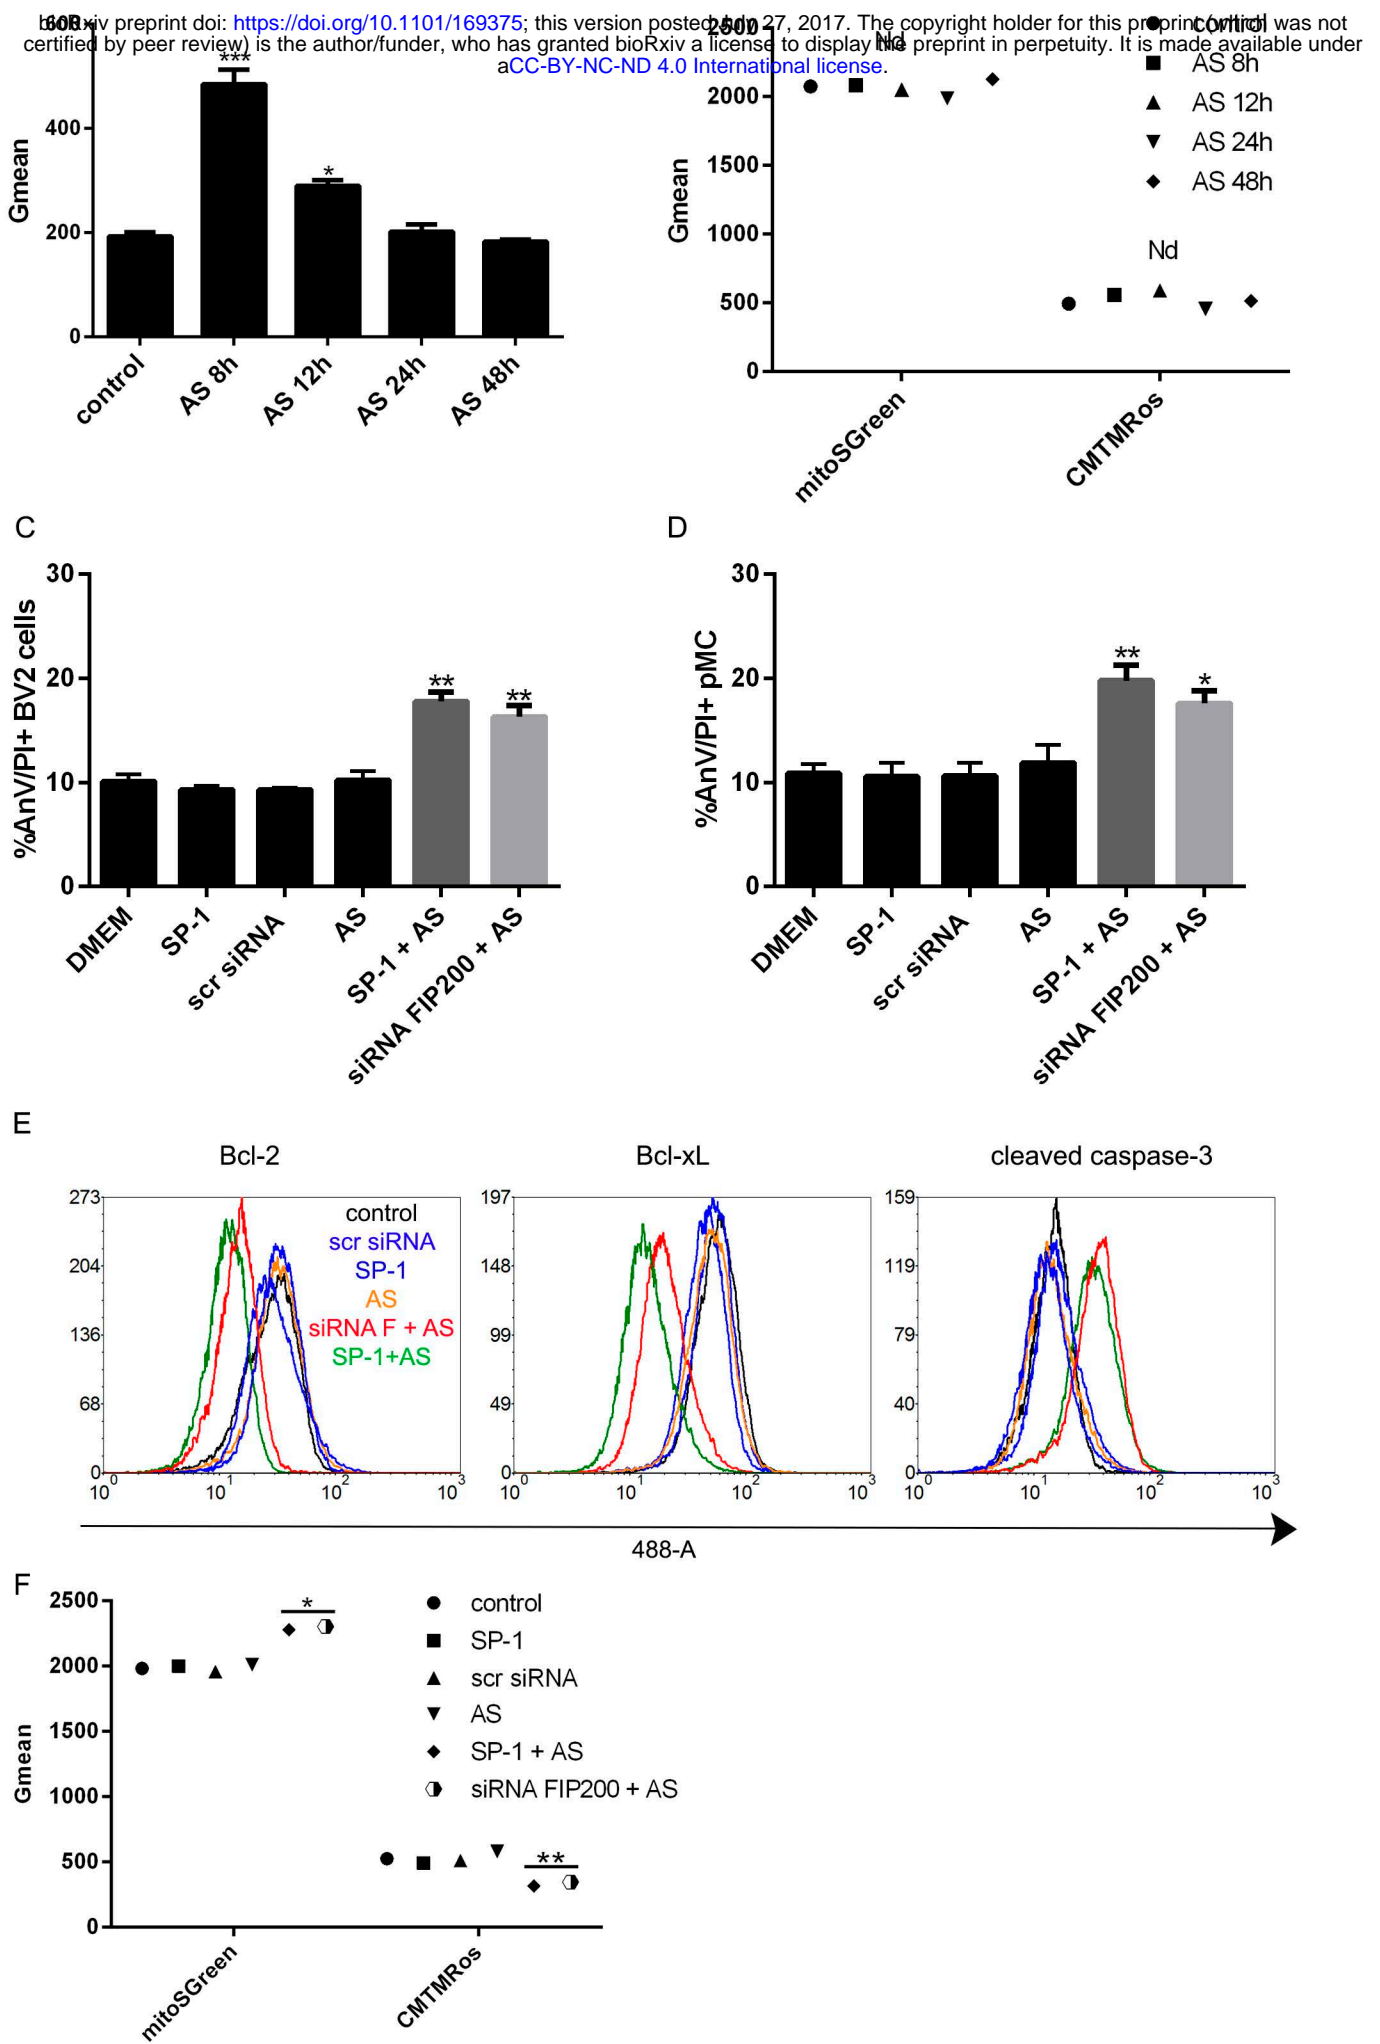



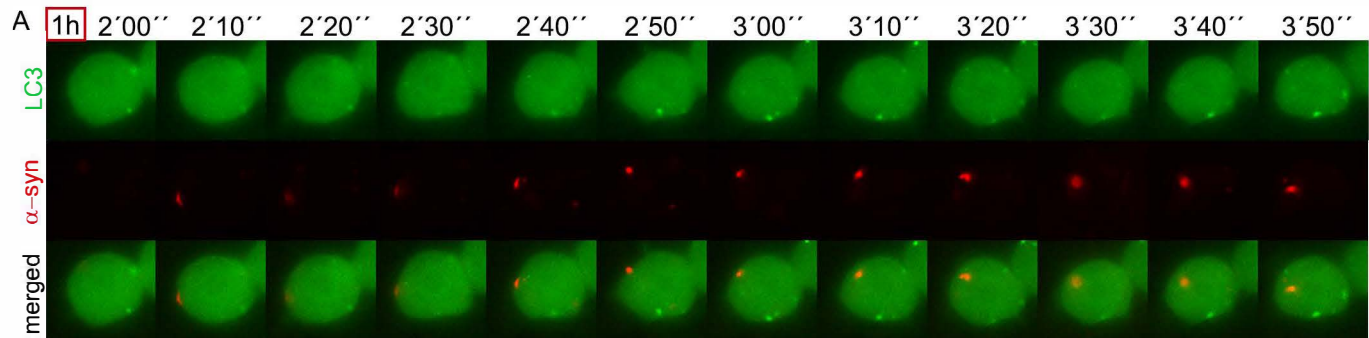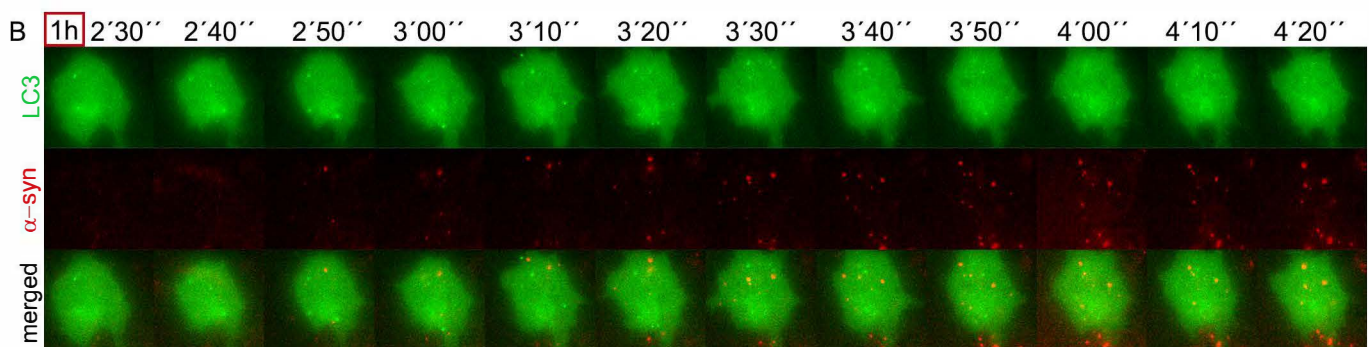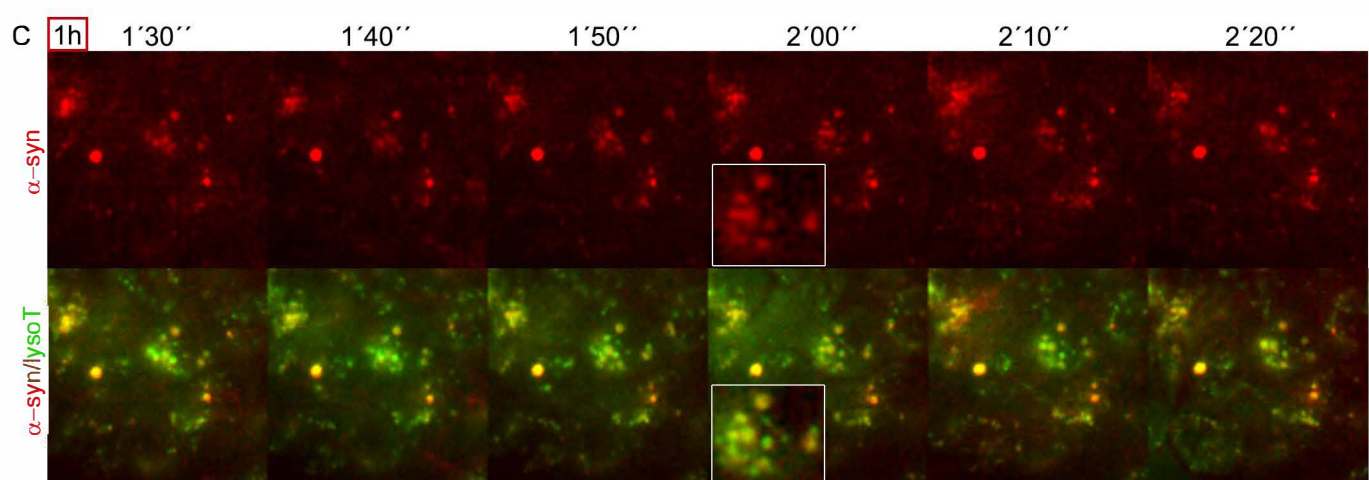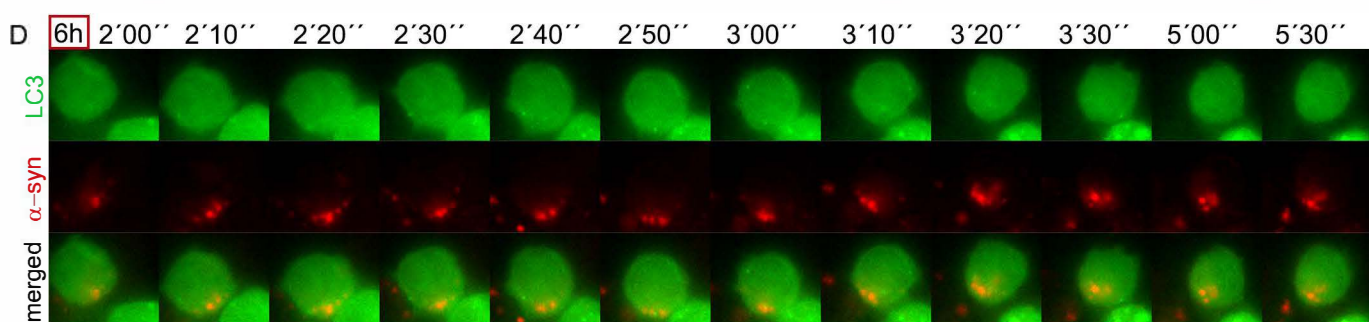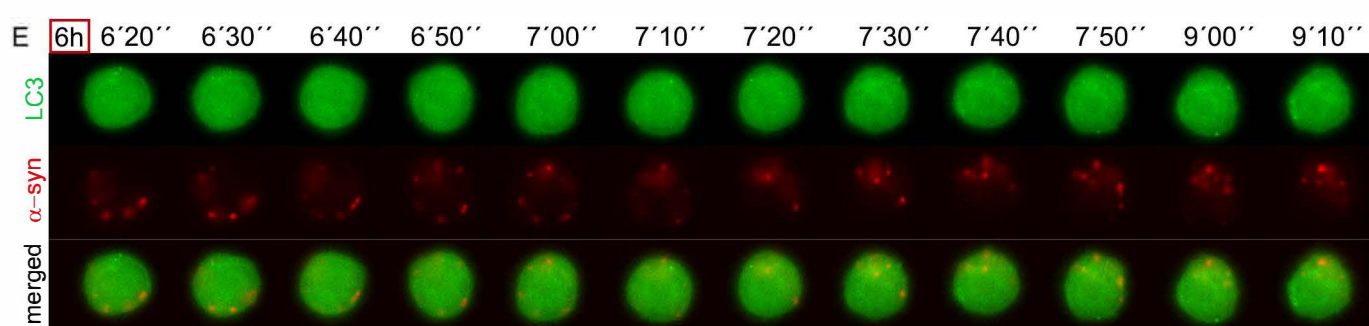

A

bioRxiv preprint doi: <https://doi.org/10.1101/169375>; this version posted July 27, 2017. The copyright holder for this preprint (which was not certified by peer review) is the author/funder, who has granted bioRxiv a license to display the preprint in perpetuity. It is made available under aCC-BY-NC-ND 4.0 International license.

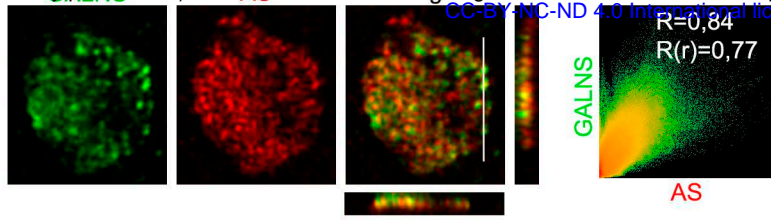

B

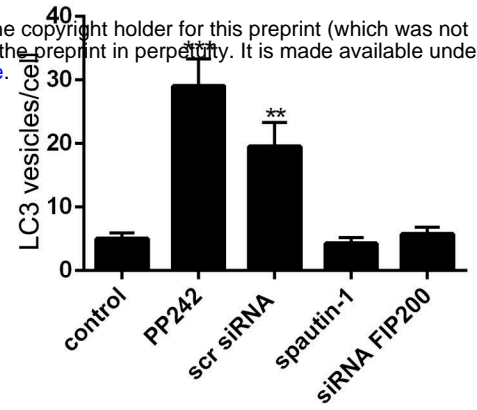

C

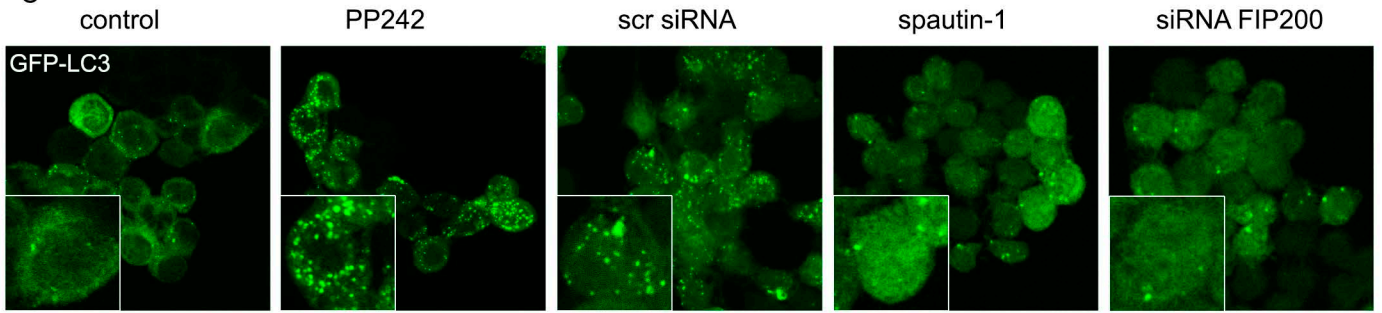

D

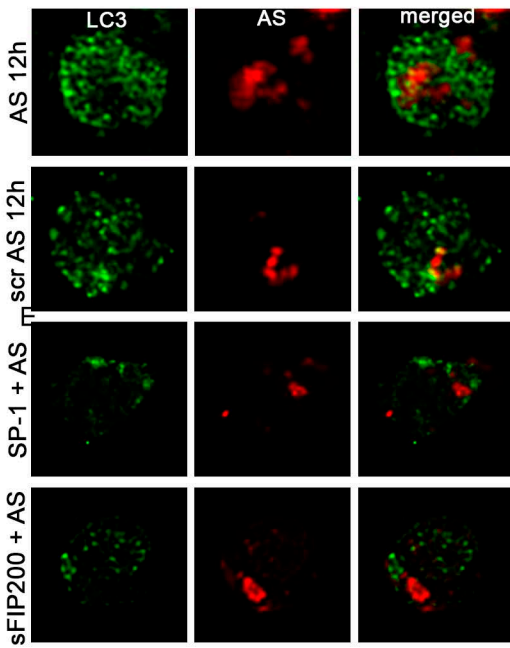

E

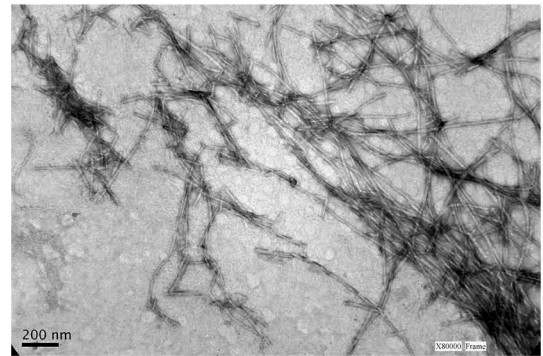

F

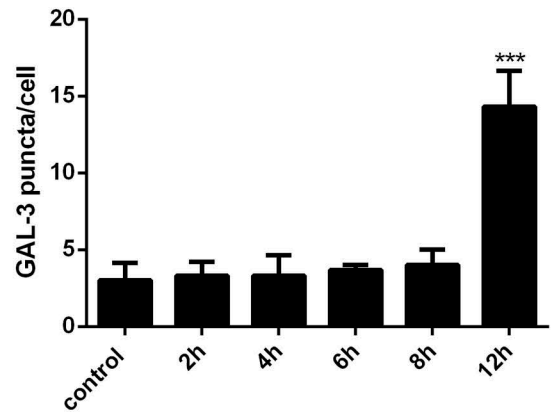

G

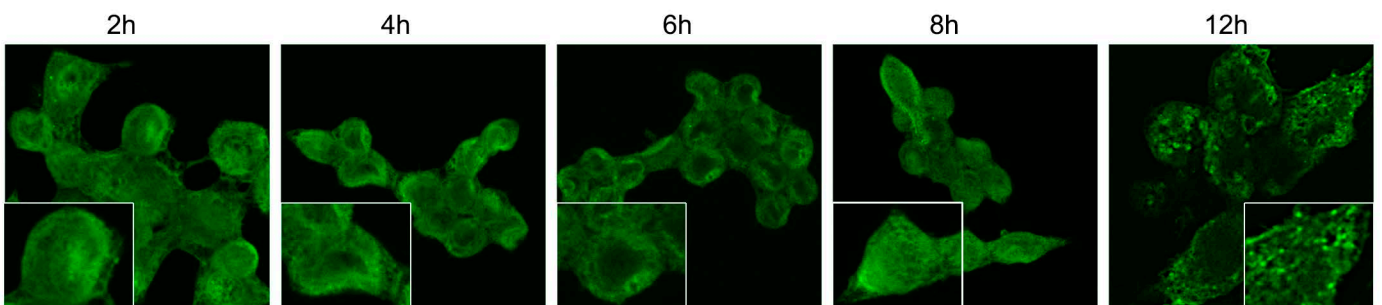



# FS3 A

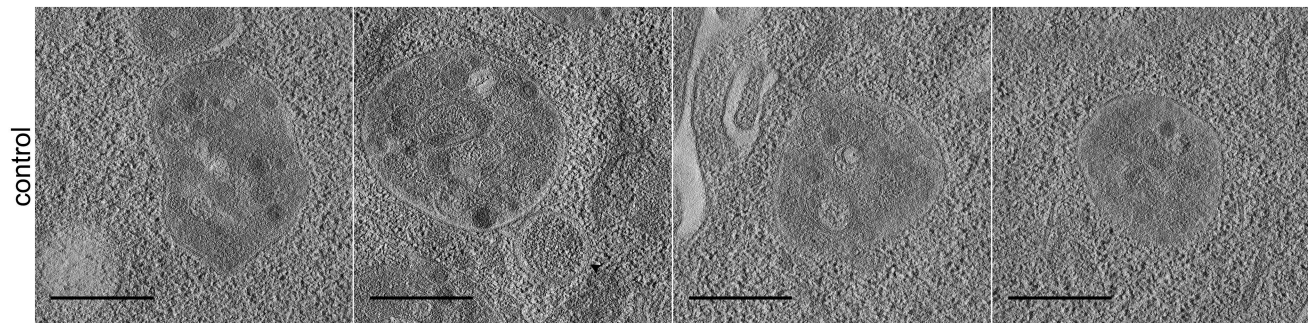

# B

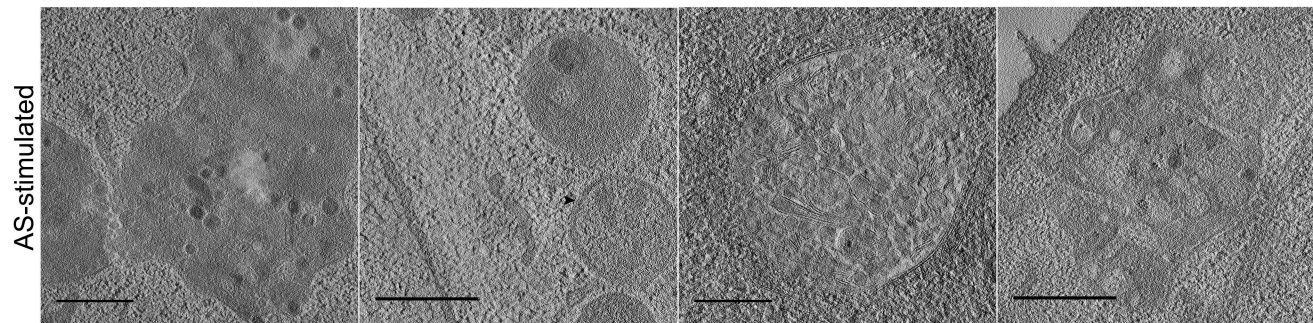

# C

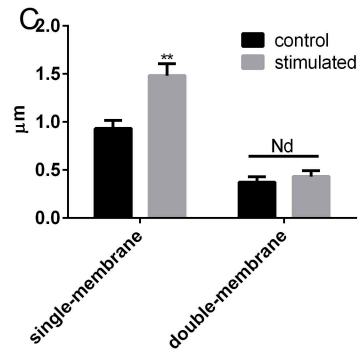

Source: http://www.biorxiv.org/content/10.1101/169375v1.full.pdf
